# Supplementary material for: Desymmetrizing asymmetric ring expansion: stereoselective synthesis of 7-membered cyclic β-keto carbonyl compounds with an α-hydrogen
Source: Royal Society of Chemistry journal article supplement (doi:10.1039/c0cc01424a), 2010-01-01

# Desymmetrizing Asymmetric Ring Expansion: Stereoselective Synthesis of 7-Membered Cyclic $\beta$ -Keto Carbonyl Compounds with an $\alpha$ -Hydrogen

Takuya Hashimoto, Yuki Naganawa, and Keiji Maruoka\*

Department of Chemistry, Graduate School of Science, Kyoto University  
Sakyo, Kyoto 606-8502, Japan

**General Information.** Infrared (IR) spectra were recorded on a Shimadzu IRPrestige-21 spectrometer.  $^1\text{H}$  NMR spectra were measured on a JEOL JNM-FX400 (400 MHz) spectrometer. Data were reported as follows: chemical shifts in ppm from tetramethylsilane as an internal standard, integration, multiplicity (s = singlet, d = doublet, t = triplet, q = quartet, dd = double-doublet, ddd = double-double-doublet, dt = double-triplet, m = multiplet, br = broad, and app = apparent), coupling constants (Hz), and assignment.  $^{13}\text{C}$  NMR spectra were measured on a JEOL JNM-FX400 (100 MHz) spectrometer with complete proton decoupling. Chemical shifts were reported in ppm from the residual solvent as an internal standard. High-resolution mass spectra (HRMS) were performed on Bruker microTOF. Optical rotations were measured on a JASCO DIP-1000 digital polarimeter. For thin layer chromatography (TLC) analysis throughout this work, Merck precoated TLC plates (silica gel 60 GF<sub>254</sub>, 0.25 mm) were used. The products were purified by flash column chromatography on silica gel 60 (Merck, 230-400 mesh). High performance liquid chromatography (HPLC) was performed on Shimadzu 10A instruments at 254 nm using 4.6 mm x 25 cm Daicel Chiral columns.

In experiments requiring dry solvent, dichloromethane was purchased from Kanto Chemical Co. Inc. as “Dehydrated” and further purified by passing through neutral alumina under nitrogen atmosphere.  $\text{BF}_3 \cdot \text{OEt}_2$  was purchased from Tokyo Chemical Industry Co., Ltd. and distilled from  $\text{CaH}_2$ . Simple cyclic ketones were purchased and used after distillation or column chromatography on silica gel.

**Preparation of *N*-(2-diazo)acetyl (+)-camphorsultam ((+)-1a) using the procedure of Fukuyama et al.<sup>1</sup>**

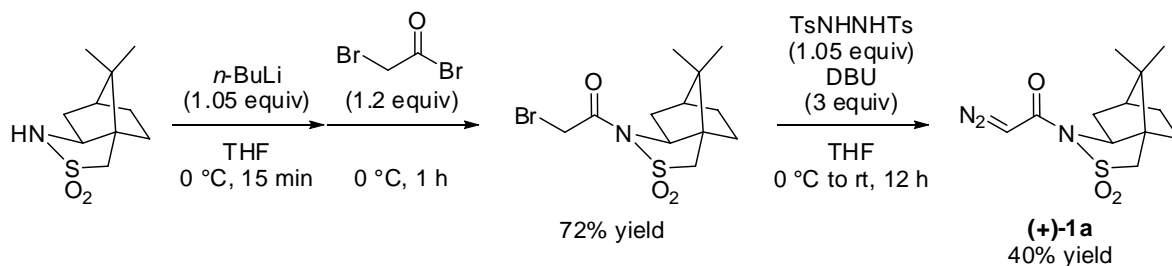

To a stirred solution of (+)-camphorsultam (6.67 g, 31 mmol) in THF (40 mL), *n*-BuLi (1.6 M hexane solution, 20 mL, 32.5 mmol) was added dropwise at 0 °C under Ar atmosphere. After 15 min, bromoacetyl bromide (3.26 mL, 37 mmol) was added dropwise, and the mixture was stirred at the same temperature for 1 h. The resulting mixture was quenched with saturated aqueous NH<sub>4</sub>Cl and extracted with ethyl acetate. The combined organic layers were dried over Na<sub>2</sub>SO<sub>4</sub> and evaporated. The residue was purified by flash column chromatography (eluting with hexane/ethyl acetate = 7:1) to afford *N*-bromoacetyl (+)-camphorsultam (7.83 g, 22.2 mmol). Spectral data of this compound was reported in the literature.<sup>2</sup>

To a stirred solution of thus-obtained *N*-bromoacetyl (+)-camphorsultam (7.83 g, 22.2 mmol) and *N,N'*-ditosylhydrazine (9.07 g, 26.6 mmol) in THF (50 mL) was added DBU (9.7 mL, 66.6 mmol) at 0 °C. The reaction mixture was then allowed to warm to room temperature. After stirring for 12 h, the resulting mixture was quenched with saturated aqueous NH<sub>4</sub>Cl, and extracted with ethyl acetate. The combined organic layers were washed with brine, and dried over anhydrous Na<sub>2</sub>SO<sub>4</sub>. The solvent was removed under reduced pressure, and the residue was purified by flash column chromatography (eluting with hexane/ethyl acetate = 8:1) to give the title compound (2.54 g, 9.0 mmol) as a pale yellow solid. Spectral data of this compound was reported in the literature.<sup>3</sup>

## Preparation of functionalized cyclohexanones.

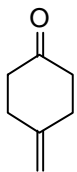

### 4-Methylenecyclohexanone.

Prepared according to the literature.<sup>4a</sup>

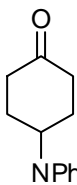

### 4-(*N*-Phthaloylamino)cyclohexanone (4d).

Prepared according to the literature.<sup>4b</sup>

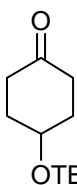

### 4-(*tert*-Butyldimethylsilyloxy)cyclohexanone (4e).

Prepared according to the literature.<sup>4c</sup>

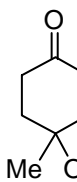

### 4-Methyl-4-(trimethylsilyloxy)cyclohexanone (4f).

Prepared according to the literature.<sup>4d</sup>

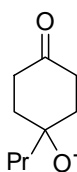

### 4-Propyl-4-(trimethylsilyloxy)cyclohexanone (4g).

Prepared according to the literature.<sup>4d</sup>

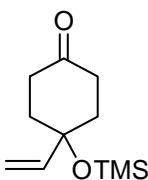

### 4-(Trimethylsilyloxy)-4-vinylcyclohexanone (4h).

Prepared according to the literature.<sup>4d</sup>

<sup>1</sup>H NMR (400 MHz, CDCl<sub>3</sub>)  $\delta$  6.07 (1H, dd,  $J$  = 18.0, 11.2 Hz), 5.20 (1H, dd,  $J$  = 18.0, 0.8 Hz), 5.15 (1H, dd, 11.2, 0.8 Hz), 2.70 (2H, dt,  $J$  = 13.6, 6.0 Hz), 2.25 (2H, m), 2.07 (2H, m), 1.85 (2H, dt,  $J$  = 13.2, 4.8 Hz), 0.15 (9H, s); <sup>13</sup>C NMR (100 MHz, CDCl<sub>3</sub>)  $\delta$  211.9, 143.8, 113.7, 72.7, 37.2, 37.0, 2.3; IR (neat) 2955, 1719, 1418, 1250, 1217, 1113, 1045, 999 cm<sup>-1</sup>; HRMS (ESI) exact mass calcd. for C<sub>11</sub>H<sub>20</sub>O<sub>2</sub>Si:  $m/z$  235.1125 ([M + Na]<sup>+</sup>), found:  $m/z$  235.1122 ([M + Na]<sup>+</sup>)

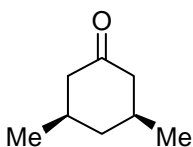

### *cis*-3,5-Dimethylcyclohexanone (4i).

Prepared according to the literature.<sup>4e</sup>

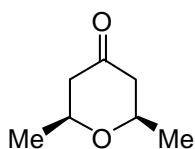

***cis*-2,6-Dimethyltetrahydropyran-4-one (4j).**

Prepared according to the literature.<sup>4f</sup>

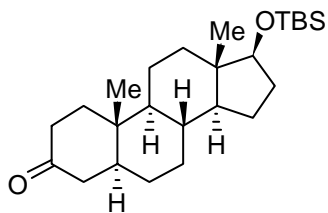

**TBSO-Dihydrotestosterone (8).**

Prepared according to the literature.<sup>4g</sup>

**General procedure for the stereoselective ring expansion of functionalized cyclic ketones with (+)-1a.**

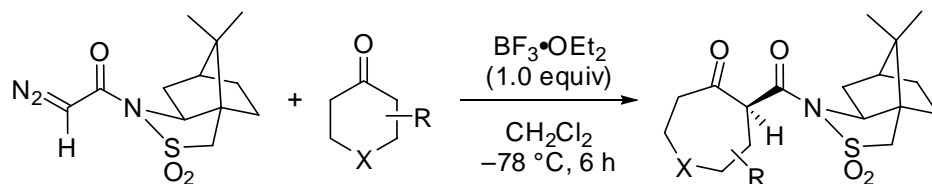

To a stirred solution of *N*-(2-diazo)acetyl (+)-camphorsultam (56.7 mg, 0.20 mmol) and cyclic ketones (0.21 mmol) in dichloromethane (1.0 mL) was added  $\text{BF}_3 \cdot \text{OEt}_2$  (25.3  $\mu\text{L}$ , 0.20 mmol) at  $-78^\circ\text{C}$  under Ar atmosphere. The reaction mixture was stirred at the same temperature for 6 h. The mixture was quenched with  $\text{H}_2\text{O}$  and extracted with ethyl acetate. The combined organic layers were dried over anhydrous  $\text{Na}_2\text{SO}_4$  and concentrated. The residue was purified by column chromatography on silica gel (eluting with hexane/ethyl acetate = 8:1~4:1) to give the corresponding cyclic  $\beta$ -keto carbonyl compound.

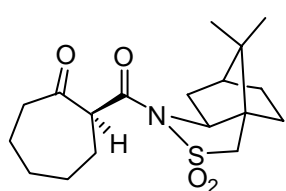

***N*-[*(2S)*-1-oxocycloheptan-2-carbonyl] (+)-camphorsultam (3a).**

$^1\text{H}$  NMR (400 MHz,  $\text{CDCl}_3$ )  $\delta$  4.28 (1H, dd,  $J = 10.5, 3.2$  Hz), 3.95 (1H, dd,  $J = 7.8, 5.4$  Hz), 3.49 (1H, d,  $J = 13.9$  Hz), 3.43 (1H, d,  $J = 13.9$  Hz), 2.78 (1H, m), 2.54 (1H, ddd,  $J = 15.6, 11.7, 3.9$  Hz), 2.01-2.22 (3H, m), 1.76-2.00 (7H, m), 1.66 (1H, m), 1.52 (1H, m), 1.23-1.44 (3H, m), 1.16 (3H, s), 0.98 (3H, s);  $^{13}\text{C}$  NMR (100 MHz,  $\text{CDCl}_3$ )  $\delta$  207.6, 169.1, 65.6, 57.7, 52.9, 48.4, 47.7, 44.8, 43.4, 38.6, 32.9, 29.0, 28.9, 28.5, 26.3, 23.6, 21.1, 19.8; IR (neat) 2938, 1719, 1684, 1327, 1269, 1236, 1211, 1165, 1136, 1113  $\text{cm}^{-1}$ ; HRMS (ESI) exact mass calcd. for  $\text{C}_{18}\text{H}_{27}\text{NO}_4\text{S}$ :  $m/z$  376.1553 ( $[\text{M} + \text{Na}]^+$ ), found:  $m/z$  376.1561 ( $[\text{M} + \text{Na}]^+$ );  $[\alpha]_{\text{D}}^{23} = +111.0$  ( $c = 1.0$ ,  $\text{CHCl}_3$ ). [72% yield]

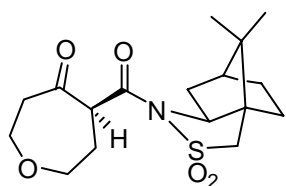

***N*-[*(2S)*-1-oxo-5-oxepan-2-carbonyl] (+)-camphorsultam (3b).**

$^1\text{H}$  NMR (400 MHz,  $\text{CDCl}_3$ )  $\delta$  4.49 (1H, dd,  $J = 11.0, 3.4$  Hz), 4.07 (2H, m), 3.98 (1H, dd,  $J = 8.0, 5.4$  Hz), 3.75 (1H, ddd,  $J = 13.6, 8.8, 5.4$  Hz), 3.66 (1H, ddd,  $J = 13.0, 11.0, 2.4$  Hz), 3.51 (1H, d,  $J = 14.2$  Hz), 3.44 (1H, d,  $J = 14.2$  Hz), 2.80-2.88 (2H, m), 1.84-2.24 (7H, m), 1.24-1.55 (2H, m), 1.16 (3H, s), 0.98 (3H, s);  $^{13}\text{C}$  NMR (100 MHz,  $\text{CDCl}_3$ )  $\delta$  204.3, 167.9, 71.4, 66.3, 65.7, 57.0, 52.9, 48.5, 47.7, 45.8, 44.8, 38.6, 33.0, 30.4, 26.2, 21.2, 19.9; IR (neat) 2959, 1724, 1692, 1325, 1292, 1236, 1219, 1167, 1152, 1134  $\text{cm}^{-1}$ ; HRMS (ESI) exact mass calcd. for  $\text{C}_{17}\text{H}_{25}\text{NO}_5\text{S}$ :  $m/z$  378.1346 ( $[\text{M} + \text{Na}]^+$ ), found:  $m/z$  378.1348 ( $[\text{M} + \text{Na}]^+$ );  $[\alpha]_{\text{D}}^{24} = +94.4$  ( $c = 1.0$ ,  $\text{CHCl}_3$ ). [75% yield]

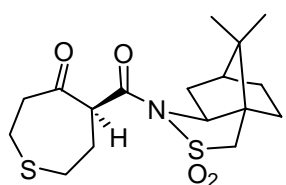

***N*-[*(2S)*-1-oxo-5-thiepan-2-carbonyl] (+)-camphorsultam (3c).**

$^1\text{H}$  NMR (400 MHz,  $\text{CDCl}_3$ )  $\delta$  4.47 (1H, dd,  $J = 10.5, 3.2$  Hz), 3.93 (1H, dd,  $J = 7.6, 5.1$  Hz), 3.50 (1H, d,  $J = 14.0$  Hz), 3.42 (1H, d,  $J$

= 14.0 Hz), 3.29(1H, m), 2.74-2.94 (5H, m), 2.07-2.36 (4H, m), 1.82-1.97 (3H, m), 1.23-1.45 (2H, m), 1.15 (3H, s), 0.98 (3H, s);  $^{13}\text{C}$  NMR (100 MHz,  $\text{CDCl}_3$ )  $\delta$  204.0, 167.1, 65.8, 56.4, 53.0, 48.5, 47.7, 46.9, 44.8, 38.6, 32.94, 32.85, 32.7, 26.7, 26.3, 21.1, 19.8; IR (neat) 2961, 1722, 1690, 1323, 1267, 1236, 1165, 1134, 1117, 1065  $\text{cm}^{-1}$ ; HRMS (ESI) exact mass calcd. for  $\text{C}_{17}\text{H}_{25}\text{NO}_4\text{S}_2$ :  $m/z$  394.1117 ( $[\text{M} + \text{Na}]^+$ ), found:  $m/z$  394.1105 ( $[\text{M} + \text{Na}]^+$ );  $[\alpha]_{\text{D}}^{21} = +57.1$  ( $c = 1.0$ ,  $\text{CHCl}_3$ ). [65% yield]

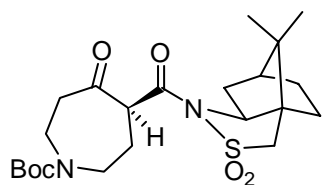

***N*-[(2*S*)-1-oxo-5-(*N*-Boc)azepan-2-carbonyl]**

**(+)-camphorsultam (3d).**

$^1\text{H}$  NMR (400 MHz,  $\text{CDCl}_3$ )  $\delta$  4.47 (1H, dd,  $J = 10.8, 3.2$  Hz), 3.80-4.16 (2H, m), 3.96 (1H, dd,  $J = 7.6, 5.2$  Hz), 3.50 (1H, d,  $J = 14.0$  Hz), 3.42 (1H, d,  $J = 14.0$  Hz), 3.28 (1H, m), 3.09 (1H, m), 2.71-2.94 (2H, m), 0.71-2.25 (9H, m), 1.44 (9H, s), 1.16 (3H, s), 0.98 (3H, s);  $^{13}\text{C}$  NMR (100 MHz,  $\text{CDCl}_3$ , 50  $^\circ\text{C}$ )  $\delta$  205.6, 167.4, 154.2, 80.2, 77.2, 65.1, 57.2, 52.9, 48.8, 45.0, 44.6, 42.7, 37.8, 29.7, 28.3, 26.6, 20.1, 19.9; IR (neat) 2961, 2928, 1724, 1690, 1366, 1325, 1236, 1219, 1165, 1136  $\text{cm}^{-1}$ ; HRMS (ESI) exact mass calcd. for  $\text{C}_{22}\text{H}_{34}\text{N}_2\text{O}_6\text{S}$ :  $m/z$  477.2030 ( $[\text{M} + \text{Na}]^+$ ), found:  $m/z$  477.2029 ( $[\text{M} + \text{Na}]^+$ );  $[\alpha]_{\text{D}}^{29} = +53.4$  ( $c = 1.0$ ,  $\text{CHCl}_3$ ). [41% yield]

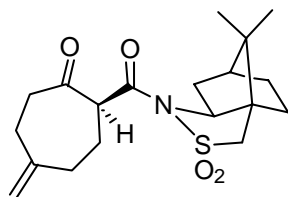

***N*-[(2*S*)-1-oxo-5-methylenecycloheptan-2-carbonyl]**

**(+)-camphorsultam (3e).**

$^1\text{H}$  NMR (400 MHz,  $\text{CDCl}_3$ )  $\delta$  4.83 (1H, m), 4.80 (1H, m), 4.39 (1H, dd,  $J = 10.7, 3.6$  Hz), 3.95 (1H, dd,  $J = 8.0, 5.4$  Hz), 3.49 (1H, d,  $J = 13.9$  Hz), 3.43 (1H, d,  $J = 13.9$  Hz), 2.82 (1H, dt,  $J = 15.6, 5.1$  Hz), 2.35-2.61 (4H, m), 2.29 (1H, m), 2.03-2.23 (3H, m), 1.81-2.00 (4H, m), 1.23-1.45 (2H, m), 1.16 (3H, s), 0.98 (3H, s);  $^{13}\text{C}$  NMR (100 MHz,  $\text{CDCl}_3$ )  $\delta$  206.4, 168.5, 147.5, 113.5, 65.7, 57.2, 52.9, 48.4, 47.7, 44.8, 43.0, 38.6, 36.0, 33.0, 31.0, 28.7, 26.3, 21.1, 19.9; IR (neat) 2953, 1721, 1692, 1325, 1267, 1238, 1211, 1167, 1134, 1119  $\text{cm}^{-1}$ ; HRMS (ESI) exact mass calcd. for  $\text{C}_{19}\text{H}_{27}\text{NO}_4\text{S}$ :  $m/z$  388.1553 ( $[\text{M} + \text{Na}]^+$ ), found:  $m/z$  388.1558 ( $[\text{M} + \text{Na}]^+$ );  $[\alpha]_{\text{D}}^{27} = +97.2$  ( $c = 1.0$ ,  $\text{CHCl}_3$ ). [80% yield]

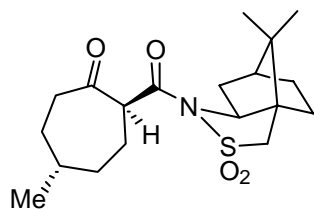

***N*-[(2*S*,5*S*)-1-oxo-5-methylcycloheptan-2-carbonyl]**

**(+)-camphorsultam (5a).**

$^1\text{H}$  NMR (400 MHz,  $\text{CDCl}_3$ )  $\delta$  4.24 (1H, dd,  $J = 11.5, 2.7$  Hz), 3.94 (1H, dd,  $J = 7.8, 5.4$  Hz), 3.49 (1H, d,  $J = 14.0$  Hz), 3.43 (1H, d,  $J = 14.0$  Hz), 2.74 (1H, m), 2.60 (1H, m), 2.02-2.23 (3H, m), 1.70-1.99 (6H, m), 1.18-1.57 (5H, m), 1.15 (3H, s), 0.98 (3H, d,  $J = 6.1$  Hz), 0.97 (3H, s);  $^{13}\text{C}$  NMR (100 MHz,  $\text{CDCl}_3$ )  $\delta$  207.5, 169.1, 65.5, 57.9, 52.9, 48.4, 47.7, 44.8, 42.3, 38.5, 37.3, 35.6, 32.9, 31.8, 28.7, 26.3, 23.8, 21.1, 19.8; IR (neat) 2953, 1719, 1682, 1327, 1269, 1234, 1213, 1165, 1136, 1113  $\text{cm}^{-1}$ ; HRMS (ESI) exact mass calcd. for  $\text{C}_{19}\text{H}_{29}\text{NO}_4\text{S}$ :

$m/z$  390.1710 ( $[M + Na]^+$ ), found:  $m/z$  390.1708 ( $[M + Na]^+$ );  $[\alpha]_D^{23} = +121.3$  ( $c = 1.0$ ,  $CHCl_3$ ). [81% yield]

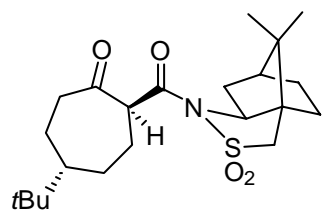

***N*-[(2*S*,5*S*)-1-oxo-5-*tert*-butylcycloheptan-2-carbonyl]  
(+)-camphorsultam (5b).**

$^1H$  NMR (400 MHz,  $CDCl_3$ )  $\delta$  4.28 (1H, dd,  $J = 11.7, 2.0$  Hz), 3.94 (1H, dd,  $J = 7.3, 5.8$  Hz), 3.49 (1H, d,  $J = 13.9$  Hz), 3.42 (1H, d,  $J = 13.9$  Hz), 2.81 (1H, dt,  $J = 16.1, 3.6$  Hz), 2.50 (1H, m), 1.73-2.24 (9H, m), 1.17-1.50 (4H, m), 1.16 (3H, s), 0.97 (3H, s), 0.94 (1H, m), 0.87 (9H, s);  $^{13}C$  NMR (100 MHz,  $CDCl_3$ )  $\delta$  207.8, 169.0, 65.6, 57.6, 52.9, 50.8, 48.4, 47.7, 44.8, 42.8, 38.6, 33.6, 32.9, 29.9, 29.6, 27.4, 26.3, 25.3, 21.1, 19.8; IR (neat) 2959, 1721, 1684, 1329, 1269, 1234, 1215, 1167, 1138, 1113  $cm^{-1}$ ; HRMS (ESI) exact mass calcd. for  $C_{22}H_{35}NO_4S$ :  $m/z$  432.2179 ( $[M + Na]^+$ ), found:  $m/z$  432.2186 ( $[M + Na]^+$ );  $[\alpha]_D^{22} = +99.1$  ( $c = 1.0$ ,  $CHCl_3$ ). [80% yield]

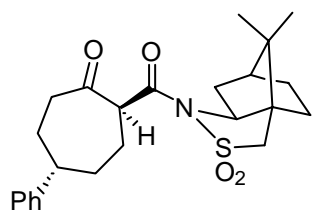

***N*-[(2*S*,5*S*)-1-oxo-5-phenylcycloheptan-2-carbonyl]  
(+)-camphorsultam (5c).**

$^1H$  NMR (400 MHz,  $CDCl_3$ )  $\delta$  7.13-7.34 (5H, m), 4.38 (1H, dd,  $J = 11.7, 3.0$  Hz), 3.97 (1H, dd,  $J = 7.8, 5.1$  Hz), 3.51 (1H, d,  $J = 13.9$  Hz), 3.45 (1H, d,  $J = 13.9$  Hz), 2.88 (1H, dt,  $J = 16.4, 4.4$  Hz), 2.76 (1H, m), 2.57 (1H, m), 1.69-2.30 (11H, m), 1.23-1.46 (2H, m), 1.17 (3H, s), 0.98 (3H, s);  $^{13}C$  NMR (100 MHz,  $CDCl_3$ )  $\delta$  207.2, 168.9, 147.4, 128.6, 126.4, 126.3, 65.6, 57.8, 52.9, 48.4, 47.7, 47.3, 44.8, 42.6, 38.5, 37.2, 33.0, 31.3, 29.1, 26.3, 21.1, 19.9; IR (neat) 2934, 1721, 1682, 1327, 1236, 1217, 1136, 1065  $cm^{-1}$ ; HRMS (ESI) exact mass calcd. for  $C_{24}H_{31}NO_4S$ :  $m/z$  452.1866 ( $[M + Na]^+$ ), found:  $m/z$  452.1865 ( $[M + Na]^+$ );  $[\alpha]_D^{19} = +87.9$  ( $c = 1.0$ ,  $CHCl_3$ ). [78% yield]

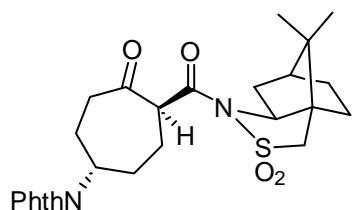

***N*-[(2*S*,5*S*)-1-oxo-5-(*N*-phthaloylamino)cycloheptan-2-carbonyl]  
(+)-camphorsultam (5d).**

$^1H$  NMR (400 MHz,  $CDCl_3$ )  $\delta$  7.83 (2H, m), 7.71 (2H, m), 4.39 (1H, dd,  $J = 12.0, 3.2$  Hz), 4.12 (1H, m), 3.96 (1H, dd,  $J = 8.1, 5.6$  Hz), 3.51 (1H, d,  $J = 13.9$  Hz), 3.44 (1H, d,  $J = 13.9$  Hz), 0.86-2.76 (15H, m), 1.17 (3H, s), 0.98 (3H, s);  $^{13}C$  NMR (100 MHz,  $CDCl_3$ )  $\delta$  206.1, 168.6, 167.7, 134.0, 131.8, 123.3, 65.6, 57.5, 52.9, 52.2, 48.5, 47.7, 44.8, 40.6, 38.5, 32.9, 32.6, 28.2, 27.3, 26.3, 21.1, 19.9; IR (neat) 2959, 1707, 1395, 1373, 1329, 1236, 1213, 1167, 1138  $cm^{-1}$ ; HRMS (ESI) exact mass calcd. for  $C_{26}H_{30}N_2O_6S$ :  $m/z$  521.1717 ( $[M + Na]^+$ ), found:  $m/z$  521.1709 ( $[M + Na]^+$ );  $[\alpha]_D^{21} = +85.8$  ( $c = 1.0$ ,  $CHCl_3$ ). [40% yield]

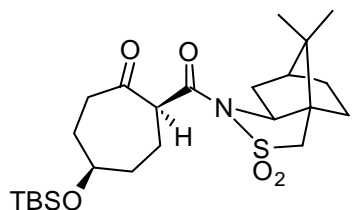

***N*-[(2*S*,5*R*)-1-oxo-5-(*tert*-butyldimethylsiloxy)cycloheptan-2-carbonyl]  
(+)-camphorsultam (5e).**

$^1\text{H}$  NMR (400 MHz,  $\text{CDCl}_3$ )  $\delta$  4.16 (1H, m), 4.13 (1H, dd,  $J = 11.2, 2.7$  Hz), 3.95 (1H, dd,  $J = 7.8, 5.2$  Hz), 3.49 (1H, d,  $J = 13.9$  Hz), 3.43 (1H, d,  $J = 13.9$  Hz), 2.93 (1H, m), 2.48 (1H, m), 2.02-2.31 (3H, m), 1.75-2.02 (7H, m), 1.62 (1H, m), 1.23-1.44 (2H, m), 1.15 (3H, s), 0.97 (3H, s), 0.87 (9H, s), 0.04 (3H, s), 0.03 (3H, s);  $^{13}\text{C}$  NMR (100 MHz,  $\text{CDCl}_3$ )  $\delta$  207.2, 169.4, 67.6, 65.5, 58.2, 52.9, 48.3, 47.7, 44.8, 38.5, 36.6, 36.4, 32.9, 30.6, 26.3, 25.7, 22.2, 21.1, 19.9, 18.0, -4.9, -5.0; IR (neat) 2953, 1721, 1688, 1327, 1252, 1217, 1209, 1136, 1082, 1067  $\text{cm}^{-1}$ ; HRMS (ESI) exact mass calcd. for  $\text{C}_{24}\text{H}_{41}\text{NO}_5\text{SSi}$ :  $m/z$  506.2367 ( $[\text{M} + \text{Na}]^+$ ), found:  $m/z$  506.2377 ( $[\text{M} + \text{Na}]^+$ );  $[\alpha]_{\text{D}}^{22} = +86.7$  ( $c = 1.0$ ,  $\text{CHCl}_3$ ). [81% yield]

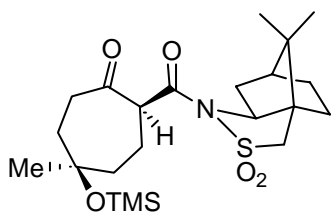

***N*-[(2*S*,5*R*)-1-oxo-5-methyl-5-trimethylsilocycloheptan-2-carbonyl] (+)-camphorsultam (5f).**

$^1\text{H}$  NMR (400 MHz,  $\text{CDCl}_3$ )  $\delta$  4.12 (1H, dd,  $J = 11.5, 2.5$  Hz), 3.95 (1H, dd,  $J = 7.8, 5.1$  Hz), 3.49 (1H, d,  $J = 13.9$  Hz), 3.43 (1H, d,  $J = 13.9$  Hz), 2.90 (1H, ddd,  $J = 16.4, 11.7, 4.6$  Hz), 2.45 (1H, m), 2.04-2.25 (3H, m), 1.71-1.98 (7H, m), 1.24-1.62 (3H, m), 1.33 (3H, s), 1.15 (3H, s), 0.97 (3H, s), 0.11 (9H, s);  $^{13}\text{C}$  NMR (100 MHz,  $\text{CDCl}_3$ )  $\delta$  207.3, 169.4, 73.6, 65.5, 58.2, 52.3, 48.3, 47.7, 44.8, 42.8, 38.5, 37.8, 37.0, 32.9, 31.9, 26.3, 23.8, 21.1, 19.9, 2.3; IR (neat) 2961, 1721, 1686, 1327, 1250, 1215, 1167, 1134, 1094  $\text{cm}^{-1}$ ; HRMS (ESI) exact mass calcd. for  $\text{C}_{22}\text{H}_{37}\text{NO}_5\text{SSi}$ :  $m/z$  478.2054 ( $[\text{M} + \text{Na}]^+$ ), found:  $m/z$  478.2055 ( $[\text{M} + \text{Na}]^+$ );  $[\alpha]_{\text{D}}^{22} = +98.4$  ( $c = 1.0$ ,  $\text{CHCl}_3$ ). [76% yield]

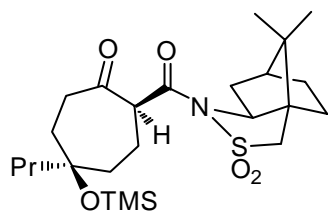

***N*-[(2*S*,5*R*)-1-oxo-5-trimethylsiloxy-5-propylcycloheptan-2-carbonyl] (+)-camphorsultam (5g).**

$^1\text{H}$  NMR (400 MHz,  $\text{CDCl}_3$ )  $\delta$  4.10 (1H, dd,  $J = 11.0, 2.7$  Hz), 3.95 (1H, dd,  $J = 7.8, 5.1$  Hz), 3.49 (1H, d,  $J = 13.9$  Hz), 3.44 (1H, d,  $J = 13.9$  Hz), 2.88 (1H, ddd,  $J = 16.4, 11.0, 5.4$  Hz), 2.47 (1H, m), 2.04-2.25 (3H, m), 1.71-1.98 (7H, m), 1.47-1.65 (3H, m), 1.22-1.45 (4H, m), 1.15 (3H, s), 0.97 (3H, s), 0.91 (3H, t,  $J = 7.3$  Hz), 0.11 (9H, s);  $^{13}\text{C}$  NMR (100 MHz,  $\text{CDCl}_3$ )  $\delta$  207.4, 169.4, 76.4, 65.5, 58.0, 52.9, 48.4, 47.7, 47.6, 44.8, 40.0, 38.5, 37.8, 34.7, 32.9, 26.3, 23.6, 21.1, 19.9, 17.4, 14.7, 2.4; IR (neat) 2957, 1684, 1721, 1329, 1250, 1238, 1213, 1167, 1134, 1084  $\text{cm}^{-1}$ ; HRMS (ESI) exact mass calcd. for  $\text{C}_{24}\text{H}_{41}\text{NO}_5\text{SSi}$ :  $m/z$  506.2367 ( $[\text{M} + \text{Na}]^+$ ), found:  $m/z$  506.2361 ( $[\text{M} + \text{Na}]^+$ );  $[\alpha]_{\text{D}}^{21} = +73.9$  ( $c = 1.0$ ,  $\text{CHCl}_3$ ). [68% yield]

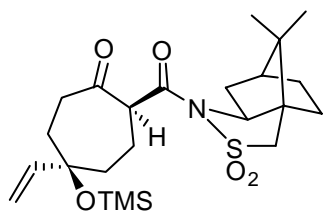

***N*-[(2*S*,5*R*)-1-oxo-5-trimethylsiloxy-5-vinylcycloheptan-2-carbonyl] (+)-camphorsultam (5g).**

$^1\text{H}$  NMR (400 MHz,  $\text{CDCl}_3$ )  $\delta$  5.99 (1H, dd,  $J = 18.0, 11.2$  Hz), 5.14 (1H, dd,  $J = 18.0, 0.8$  Hz), 5.08 (1H, dd,  $J = 11.2, 0.8$  Hz), 4.13 (1H, dd,  $J = 11.6, 3.2$  Hz), 3.96 (1H, dd,  $J = 8.0, 5.2$  Hz), 3.49 (1H, d,  $J = 14.0$  Hz), 3.44 (1H, d,  $J = 14.0$  Hz), 2.94 (1H, ddd,  $J = 16.0, 12.4, 3.2$  Hz), 2.51 (1H, ddd,  $J = 16.4, 5.2, 3.2$  Hz), 1.25-2.26 (13H, m), 1.15 (3H, s), 0.98 (3H, s), 0.09

(9H, s);  $^{13}\text{C}$  NMR (100 MHz,  $\text{CDCl}_3$ )  $\delta$  207.2, 169.4, 146.0, 112.7, 75.0, 65.5, 58.1, 52.9, 48.4, 47.7, 44.8, 39.9, 38.5, 37.4, 34.6, 32.9, 26.3, 23.2, 21.1, 19.9, 2.3; IR (neat) 2957, 1721, 1686, 1329, 1250, 1213, 1136, 1084, 1065, 1047  $\text{cm}^{-1}$ ; HRMS (ESI) exact mass calcd. for  $\text{C}_{23}\text{H}_{37}\text{NO}_5\text{SSi}$ :  $m/z$  490.2054 ( $[\text{M} + \text{Na}]^+$ ), found:  $m/z$  490.2072 ( $[\text{M} + \text{Na}]^+$ );  $[\alpha]_{\text{D}}^{29} = +86.5$  ( $c = 1.0$ ,  $\text{CHCl}_3$ ). [41% yield]

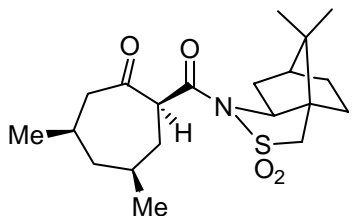

***N*-[(2*S*,4*S*,6*R*)-1-oxo-4,6-dimethylcycloheptan-2-carbonyl]  
(+)-camphorsultam (5i).**

$^1\text{H}$  NMR (400 MHz,  $\text{CDCl}_3$ )  $\delta$  4.34 (1H, dd,  $J = 11.7, 2.4$  Hz), 3.94 (1H, dd,  $J = 7.8, 5.2$  Hz), 3.49 (1H, d,  $J = 13.9$  Hz), 3.42 (1H, d,  $J = 13.9$  Hz), 2.78 (1H, ddd,  $J = 16.4, 3.6, 1.7$  Hz), 2.31 (1H, dd,  $J = 16.6, 11.7$  Hz), 1.98-2.23 (4H, m), 1.52-1.96 (7H, m), 1.23-1.46 (2H, m), 1.16 (3H, s), 1.00 (3H, d,  $J = 6.6$  Hz), 0.97 (3H, s), 0.96 (3H, d,  $J = 6.6$  Hz);  $^{13}\text{C}$  NMR (100 MHz,  $\text{CDCl}_3$ )  $\delta$  206.8, 168.8, 65.7, 56.9, 52.9, 51.7, 48.4, 47.7, 46.5, 44.8, 38.6, 37.4, 34.9, 33.0, 29.9, 26.3, 23.8, 23.7, 21.1, 19.9; IR (neat) 2957, 1719, 1686, 1327, 1288, 1238, 1213, 1165, 1134, 1113  $\text{cm}^{-1}$ ; HRMS (ESI) exact mass calcd. for  $\text{C}_{20}\text{H}_{31}\text{NO}_4\text{S}$ :  $m/z$  404.1866 ( $[\text{M} + \text{Na}]^+$ ), found:  $m/z$  404.1866 ( $[\text{M} + \text{Na}]^+$ );  $[\alpha]_{\text{D}}^{20} = +118.0$  ( $c = 1.0$ ,  $\text{CHCl}_3$ ). [73% yield]

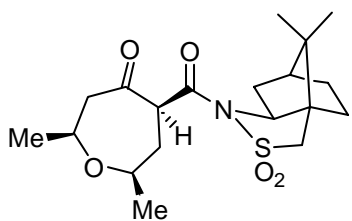

***N*-[(2*S*,4*R*,6*S*)-1-oxo-4,6-dimethyl-5-oxepan-2-carbonyl]  
(+)-camphorsultam (5j).**

$^1\text{H}$  NMR (400 MHz,  $\text{CDCl}_3$ )  $\delta$  4.57 (1H, dd,  $J = 10.8, 3.9$  Hz), 4.04 (1H, m), 3.97 (1H, dd,  $J = 8.1, 5.1$  Hz), 3.79 (1H, m), 3.50 (1H, d,  $J = 13.9$  Hz), 3.43 (1H, d,  $J = 13.9$  Hz), 2.90 (1H, dd,  $J = 17.1, 3.2$  Hz), 2.63 (1H, dd,  $J = 17.1, 11.0$  Hz), 2.21 (1H, m), 2.12 (1H, dd,  $J = 14.2, 8.0$  Hz), 1.83-2.00 (5H, m), 1.30-1.45 (2H, m), 1.24 (3H, d,  $J = 6.4$  Hz), 1.23 (3H, d,  $J = 6.3$  Hz), 1.16 (3H, s), 0.97 (3H, s);  $^{13}\text{C}$  NMR (100 MHz,  $\text{CDCl}_3$ )  $\delta$  203.8, 167.6, 77.2, 72.1, 65.8, 56.2, 52.9, 52.8, 48.5, 47.7, 44.9, 38.6, 37.9, 33.0, 26.2, 22.5, 22.4, 21.2, 19.8; IR (neat) 2941, 1719, 1692, 1323, 1287, 1223, 1167, 1134, 1121, 1053  $\text{cm}^{-1}$ ; HRMS (ESI) exact mass calcd. for  $\text{C}_{19}\text{H}_{29}\text{NO}_5\text{S}$ :  $m/z$  406.1659 ( $[\text{M} + \text{Na}]^+$ ), found:  $m/z$  406.1659 ( $[\text{M} + \text{Na}]^+$ );  $[\alpha]_{\text{D}}^{17} = +113.8$  ( $c = 1.0$ ,  $\text{CHCl}_3$ ). [86% yield]

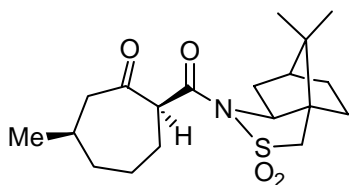

***N*-[(2*S*,6*R*)-1-oxo-6-methylcycloheptan-2-carbonyl]  
(+)-camphorsultam (7a).**

$^1\text{H}$  NMR (400 MHz,  $\text{CDCl}_3$ )  $\delta$  4.22 (1H, dd,  $J = 11.2, 3.2$  Hz), 3.93 (1H, dd,  $J = 7.4, 5.2$  Hz), 3.49 (1H, d,  $J = 14.2$  Hz), 3.43 (1H, d,  $J = 14.2$  Hz), 2.73 (1H, dd,  $J = 15.4, 11.5$  Hz), 2.49 (1H, ddd,  $J = 17.1, 12.4, 4.2$  Hz), 2.02-2.23 (3H, m), 1.68-2.01 (7H, m), 1.08-1.63 (4H, m), 1.15 (3H, s), 1.01 (3H, d,  $J = 6.6$  Hz), 0.97 (3H, s);  $^{13}\text{C}$  NMR (100 MHz,  $\text{CDCl}_3$ )  $\delta$  206.9, 169.1, 65.5, 58.2, 52.9, 51.5, 48.4, 47.7, 44.8, 38.5, 37.9, 32.9, 30.9, 29.7, 27.8, 26.3, 23.6,

21.1, 19.8; IR (neat) 2955, 1717, 1682, 1456, 1375, 1329, 1269, 1240, 1213, 1113  $\text{cm}^{-1}$ ; HRMS (ESI) exact mass calcd. for  $\text{C}_{19}\text{H}_{29}\text{NO}_4\text{S}$ :  $m/z$  390.1710 ( $[\text{M} + \text{Na}]^+$ ), found:  $m/z$  390.1720 ( $[\text{M} + \text{Na}]^+$ );  $[\alpha]_{\text{D}}^{28} = +98.7$  ( $c = 1.0$ ,  $\text{CHCl}_3$ ). [72% yield]

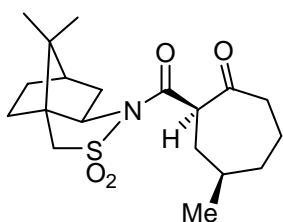

***N*-[(2*R*,4*R*)-1-oxo-4-methylcycloheptan-2-carbonyl]**

**(-)-camphorsultam (7b).**

$^1\text{H}$  NMR (400 MHz,  $\text{CDCl}_3$ )  $\delta$  4.38 (1H, dd,  $J = 11.7, 2.2$  Hz), 3.95 (1H, dd,  $J = 7.8, 5.1$  Hz), 3.49 (1H, d,  $J = 13.9$  Hz), 3.42 (1H, d,  $J = 13.9$  Hz), 2.82 (1H, ddt,  $J = 17.1, 4.4, 1.7$  Hz), 2.49 (1H, ddd,  $J = 17.1, 12.4, 4.2$  Hz), 2.20 (1H, m), 2.11 (1H, dd,  $J = 13.9, 8.4$  Hz), 2.02 (1H, m), 1.82-1.97 (5H, m), 1.64-1.82 (2H, m), 1.56 (1H, m), 1.30-1.44 (2H, m), 1.16 (3H, s), 1.02 (1H, m), 0.98 (3H, d,  $J = 6.6$  Hz), 0.98 (3H, s);  $^{13}\text{C}$  NMR (100 MHz,  $\text{CDCl}_3$ )  $\delta$  207.5, 168.8, 65.7, 56.5, 52.9, 48.4, 47.7, 44.9, 43.4, 38.6, 37.2, 37.1, 35.9, 33.0, 26.3, 23.5, 22.7, 21.2, 19.9; IR (neat) 2953, 1721, 1690, 1325, 1289, 1236, 1211, 1167, 1138, 1113  $\text{cm}^{-1}$ ; HRMS (ESI) exact mass calcd. for  $\text{C}_{19}\text{H}_{29}\text{NO}_4\text{S}$ :  $m/z$  390.1710 ( $[\text{M} + \text{Na}]^+$ ), found:  $m/z$  390.1719 ( $[\text{M} + \text{Na}]^+$ );  $[\alpha]_{\text{D}}^{27} = -107.5$  ( $c = 1.0$ ,  $\text{CHCl}_3$ ). [62% yield]

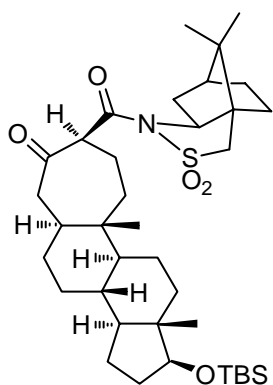

**Compound 9.**

$^1\text{H}$  NMR (400 MHz,  $\text{CDCl}_3$ )  $\delta$  4.11 (1H, dd,  $J = 9.8, 4.4$  Hz), 3.95 (1H, dd,  $J = 7.8, 5.1$  Hz), 3.53 (1H, t,  $J = 8.1$  Hz), 3.49 (1H, d,  $J = 14.2$  Hz), 3.44 (1H, d,  $J = 14.2$  Hz), 2.67 (1H, dd,  $J = 16.4, 11.7$  Hz), 2.32 (1H, dd,  $J = 16.4, 2.7$  Hz), 0.64-2.21 (27H, m), 1.15 (3H, s), 0.97 (3H, s), 0.87 (9H, s), 0.81 (3H, s), 0.68 (3H, s), 0.003 (3H, s), -0.003 (3H, s);  $^{13}\text{C}$  NMR (100 MHz,  $\text{CDCl}_3$ )  $\delta$  207.0, 169.5, 81.7, 65.5, 57.9, 53.6, 52.9, 50.7, 48.4, 48.0, 47.7, 44.8, 43.00, 42.97, 40.8, 39.0, 38.5, 37.3, 35.3, 32.9, 31.4, 31.0, 30.7, 26.3, 25.8, 24.0, 23.5, 21.3, 21.1, 19.9, 18.1, 12.3, 11.3, -4.5, -4.8; IR (neat) 2953, 2928, 1717, 1682, 1331, 1250, 1167, 1136, 1117, 1094  $\text{cm}^{-1}$ ; HRMS (ESI) exact mass calcd. for  $\text{C}_{37}\text{H}_{61}\text{NO}_5\text{SSi}$ :  $m/z$  682.3932 ( $[\text{M} + \text{Na}]^+$ ), found:  $m/z$  682.3929 ( $[\text{M} + \text{Na}]^+$ );  $[\alpha]_{\text{D}}^{22} = +80.1$  ( $c = 1.0$ ,  $\text{CHCl}_3$ ). [70% yield]

***N*-[(1*R*,2*S*)-1-hydroxycyclopentan-2-carbonyl] (+)-camphorsultam (10).**

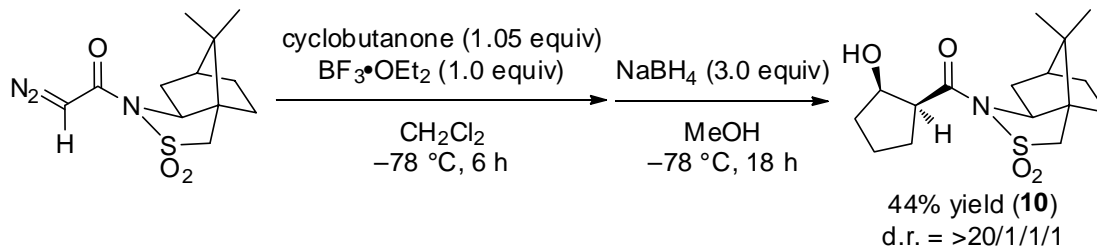

To a stirred solution of *N*-(2-diazoacetyl) (+)-camphorsultam (56.7 mg, 0.20 mmol) and cyclobutanone (15.7  $\mu\text{L}$ , 0.21 mmol) in dichloromethane (1.0 mL) was added  $\text{BF}_3 \cdot \text{OEt}_2$

(25.3  $\mu$ L, 0.20 mmol) at  $-78$   $^{\circ}$ C under Ar atmosphere. After stirring for 6 h,  $\text{NaBH}_4$  (0.3 M methanol solution, 2.0 mL, 0.6 mmol) was added to a stirred solution dropwise at  $-78$   $^{\circ}$ C. The reaction mixture was then stirred at the same temperature for additional 18 h. The mixture was quenched with 1N HCl and extracted with ethyl acetate. The combined organic layers were washed with brine, dried over  $\text{Na}_2\text{SO}_4$  and concentrated. The residue was purified by column chromatography on silica gel (eluting with hexane/ethyl acetate = 5:1) to give the title product (28.8 mg, 0.088 mmol).

$^1\text{H}$  NMR (400 MHz,  $\text{CDCl}_3$ )  $\delta$  4.51 (1H, m), 3.92 (1H, dd,  $J$  = 6.8, 6.1 Hz), 3.78 (1H, m), 3.53 (1H, d,  $J$  = 13.9 Hz), 3.46 (1H, d,  $J$  = 13.9 Hz), 3.21 (1H, ddd,  $J$  = 9.8, 8.5, 4.6 Hz), 1.56-2.24 (11H, m), 1.29-1.50 (2H, m), 1.15 (3H, s), 0.98 (3H, s);  $^{13}\text{C}$  NMR (100 MHz,  $\text{CDCl}_3$ )  $\delta$  174.9, 74.3, 65.2, 53.1, 49.0, 48.3, 47.8, 44.6, 38.5, 34.2, 32.8, 28.6, 26.4, 22.1, 20.8, 19.9; IR (neat) 3497(br), 2959, 1668, 1395, 1329, 1269, 1236, 1217, 1167, 1134  $\text{cm}^{-1}$ ; HRMS (ESI) exact mass calcd. for  $\text{C}_{16}\text{H}_{25}\text{NO}_4\text{S}$ :  $m/z$  350.1397 ( $[\text{M} + \text{Na}]^+$ ), found:  $m/z$  350.1395 ( $[\text{M} + \text{Na}]^+$ );  $[\alpha]_{\text{D}}^{24} = +99.4$  ( $c$  = 1.0,  $\text{CHCl}_3$ ).

***N*-[(1*S*,2*S*)-1-hydroxy-1-(2-methoxy-2-oxoethyl)cyclopentan-2-carbonyl]  
(+)-camphorsultam (11).**

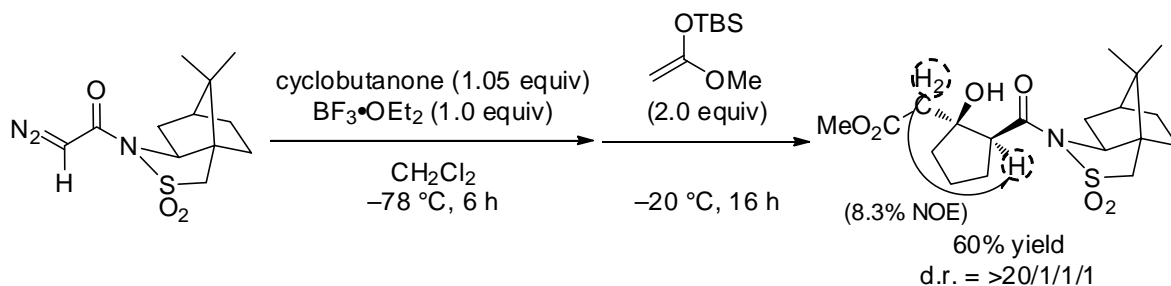

To a stirred solution of *N*-(2-diazo)acetyl (+)-camphorsultam (56.7 mg, 0.20 mmol) and cyclobutanone (15.7  $\mu$ L, 0.21 mmol) in dichloromethane (1.0 mL) was added  $\text{BF}_3 \cdot \text{OEt}_2$  (25.3  $\mu$ L, 0.20 mmol) at  $-78$   $^{\circ}$ C under Ar atmosphere. After stirring for 6 h, 1-(*tert*-butyldimethylsiloxy)-1-methoxyethene (87.3  $\mu$ L, 0.40 mmol) was added to the solution dropwise at  $-78$   $^{\circ}$ C. The reaction mixture was then warmed up to  $-20$   $^{\circ}$ C and stirred at the same temperature for additional 16 h. The mixture was quenched with aq  $\text{NaHCO}_3$  and extracted with ethyl acetate. The combined organic layers were washed with brine, dried over  $\text{Na}_2\text{SO}_4$  and concentrated. The residue was purified by column chromatography on silica gel (eluting with hexane/ethyl acetate = 5:1) to give the title product (47.9 mg, 0.12 mmol).

$^1\text{H}$  NMR (400 MHz,  $\text{CDCl}_3$ )  $\delta$  4.79 (1H, m), 3.93 (1H, app t,  $J$  = 6.6 Hz), 3.66 (3H, s), 3.51 (1H, d,  $J$  = 13.9 Hz), 3.45 (1H, d,  $J$  = 13.9 Hz), 3.18 (1H, t,  $J$  = 9.0 Hz), 2.68 (2H, s), 2.25 (1H, m), 1.83-2.15 (8H, m), 1.67-1.82 (2H, m), 1.30-1.47 (2H, m), 1.13 (3H, s), 0.98 (3H, s);  $^{13}\text{C}$  NMR (100 MHz,  $\text{CDCl}_3$ )  $\delta$  175.3, 171.2, 80.6, 65.1, 53.0, 51.5, 51.1, 48.3, 47.8, 44.6, 44.1, 38.9, 38.3, 32.8, 29.9, 26.4, 21.3, 20.8, 19.8; IR (neat) 3447(br), 2955, 1736, 1663, 1404, 1333, 1271, 1238, 1221, 1136  $\text{cm}^{-1}$ ; HRMS (ESI) exact mass calcd. for

C<sub>19</sub>H<sub>29</sub>NO<sub>6</sub>S:  $m/z$  422.1608 ([M + Na]<sup>+</sup>), found:  $m/z$  422.1598 ([M + Na]<sup>+</sup>);  $[\alpha]_D^{20} = +82.1$  ( $c$  = 1.0, CHCl<sub>3</sub>).

**Epimerization experiment of 3a with DBU (ref 8).**

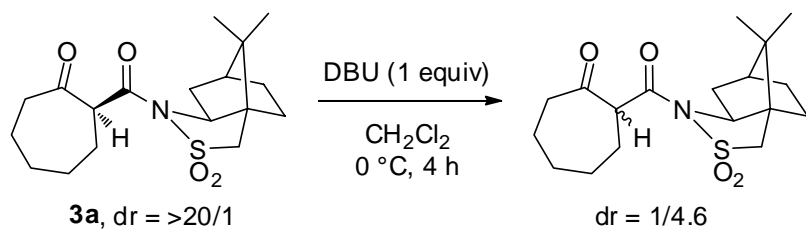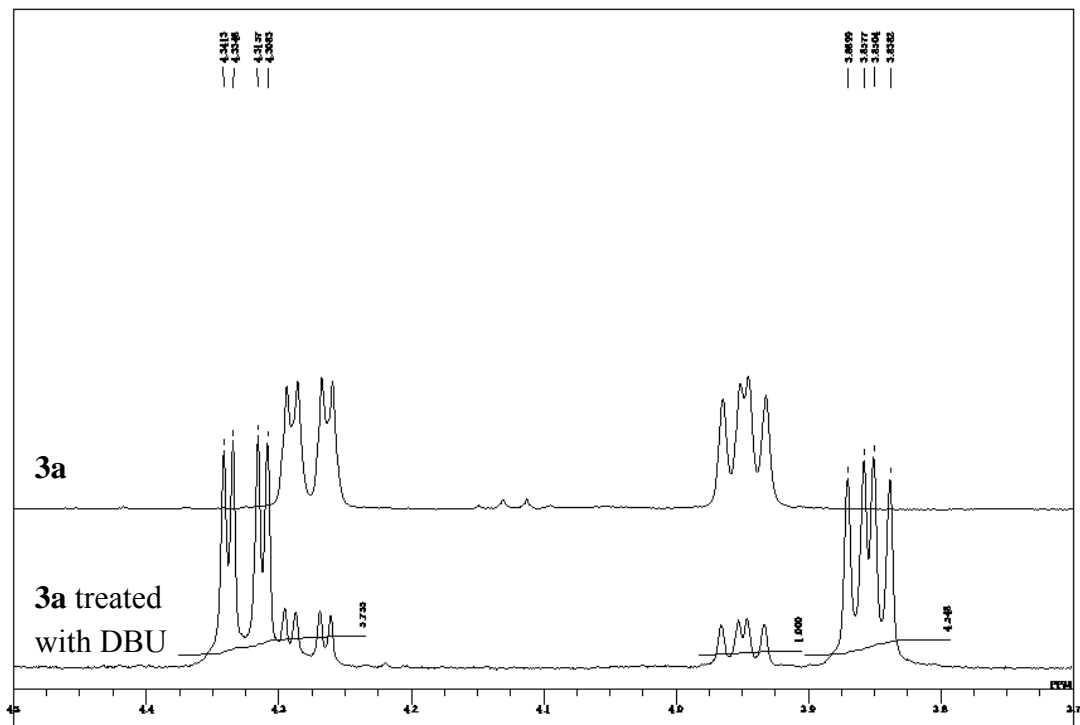

**Determination of the ee value after the reductive detachment of the chiral auxiliary (ref 9).**

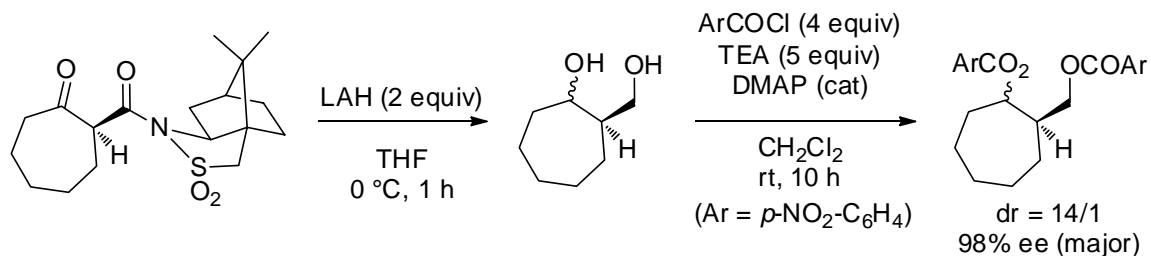

The enantiomeric purity was determined by HPLC analysis (Daicel CHIRALPAK OD-H, hexane/isopropanol = 9:1, flow rate = 0.5 mL/min, retention time; 42.0 min (major), 45.5 (minor)).

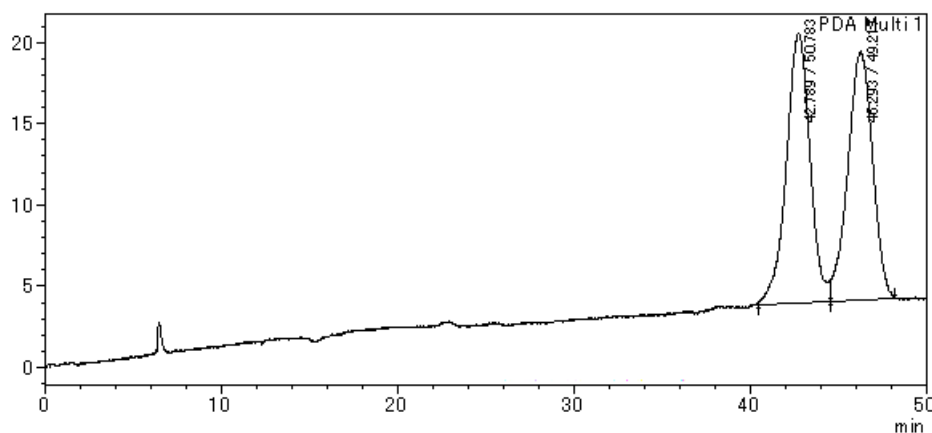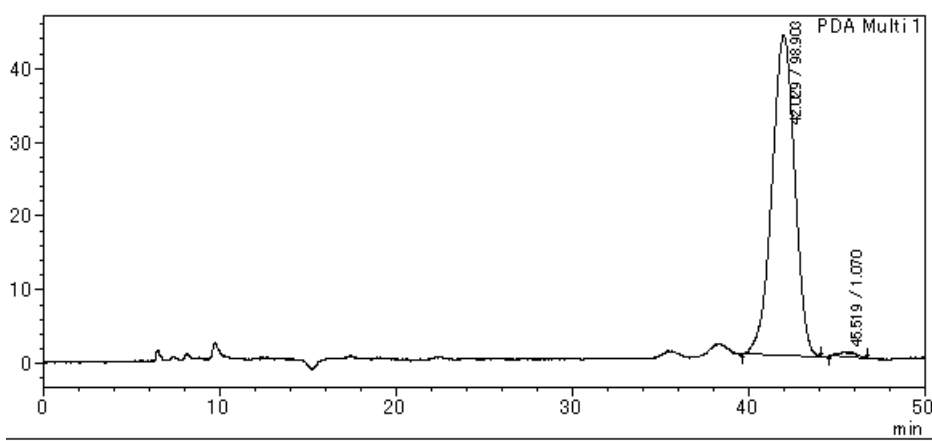

**X-ray crystallographic analysis of *N*-[(2*S*)-1-oxocycloheptan-2-carbonyl] (+)-camphorsultam (3a).**

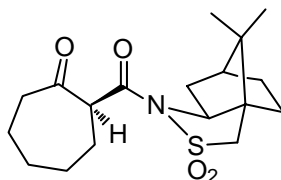

The product was recrystallized from hexane/CH<sub>2</sub>Cl<sub>2</sub>. The single crystal was mounted on a MicroMesh<sup>TM</sup> (MiTeGen). Data of X-ray diffraction were collected by a Rigaku RAXIS-RAPID Imaging Plate two-dimensional area detector using graphite-monochromated CuK $\alpha$  ( $\lambda$  = 1.54187 Å) to a maximum  $2\theta$  value of 136.5°. The crystal structure was solved by the direct methods and refined by the full-matrix least squares using the program SHELXL-97.<sup>5</sup> All non-hydrogen atoms were refined anisotropically. Hydrogen atoms were refined by using the riding model. The crystallographic data were summarized in the following table.

|                                              |                                                     |
|----------------------------------------------|-----------------------------------------------------|
| empirical formula                            | C <sub>18</sub> H <sub>27</sub> NO <sub>4</sub> S   |
| formula weight                               | 353.48                                              |
| crystal system                               | orthorhombic                                        |
| space group                                  | P2 <sub>1</sub> 2 <sub>1</sub> 2 <sub>1</sub> (#19) |
| <i>a</i> , Å                                 | 10.9574(2)                                          |
| <i>b</i> , Å                                 | 11.6430(2)                                          |
| <i>c</i> , Å                                 | 13.8557(3)                                          |
| <i>V</i> , Å <sup>3</sup>                    | 1767.66(6)                                          |
| <i>Z</i>                                     | 4                                                   |
| <i>D</i> <sub>calc</sub> , g/cm <sup>3</sup> | 1.328                                               |
| <i>T</i> , °C                                | –150                                                |
| $\mu$ (CuK $\alpha$ ), cm <sup>–1</sup>      | 18.099                                              |
| no. of reflns measured                       | 18246                                               |
| no. of reflns obsd                           | 3221                                                |
| no. of reflns variable                       | 218                                                 |
| R (All reflections)                          | 0.0380                                              |
| R <sub>w</sub> (All reflections)             | 0.0901                                              |
| Goodness of Fit                              | 1.078                                               |

The crystal structure has been deposited at the Cambridge Crystallographic Data Centre (CCDC 772682). The data can be obtained free of charge via the Internet at [www.ccdc.cam.ac.uk/conts/retrieving.html](http://www.ccdc.cam.ac.uk/conts/retrieving.html).

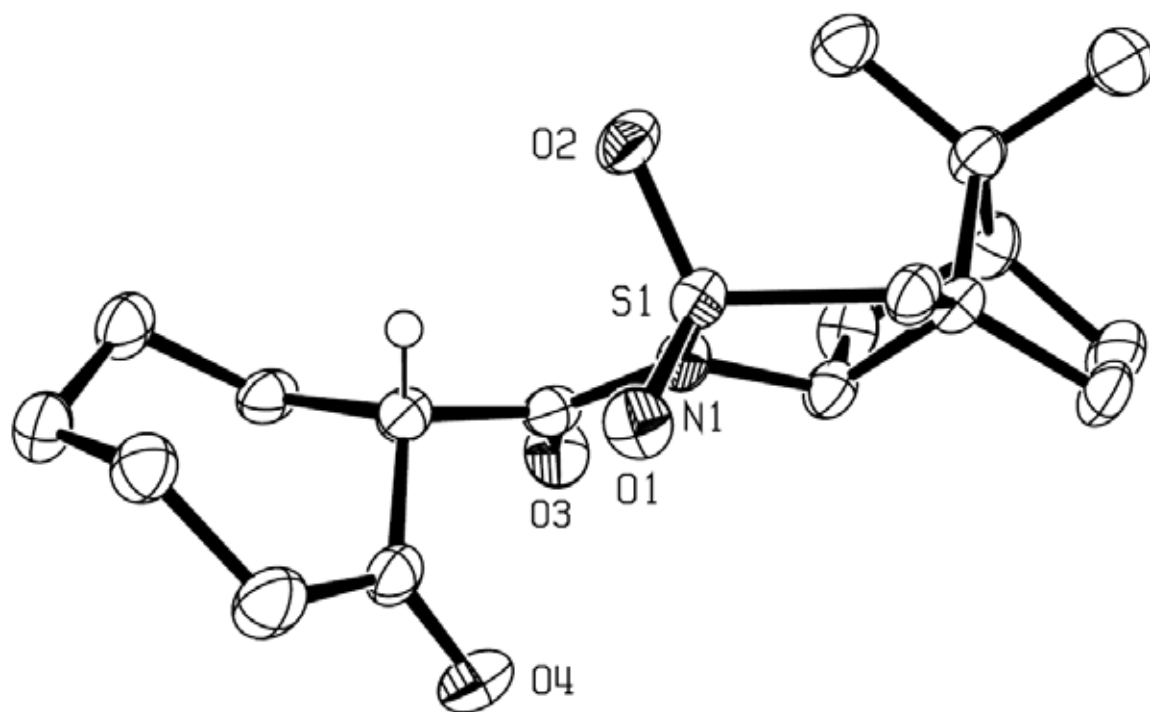

**X-ray crystallographic analysis of *N*-[(2*S*,5*S*)-1-oxo-5-methylcycloheptan-2-carbonyl] (+)-camphorsultam (5a).**

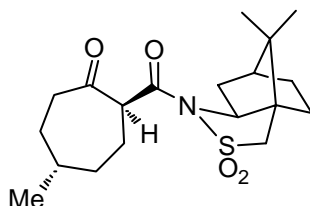

The product was recrystallized from hexane/CH<sub>2</sub>Cl<sub>2</sub>. The single crystal was mounted on a MicroMesh<sup>TM</sup> (MiTeGen). Data of X-ray diffraction were collected by a Rigaku RAXIS-RAPID Imaging Plate two-dimensional area detector using graphite-monochromated CuK $\alpha$  ( $\lambda = 1.54187$  Å) to a maximum  $2\theta$  value of 136.5°. The crystal structure was solved by the direct methods and refined by the full-matrix least squares using the program SHELXL-97.<sup>5</sup> All non-hydrogen atoms were refined anisotropically. Hydrogen atoms were refined by using the riding model. The crystallographic data were summarized in the following table.

|                                              |                                                   |
|----------------------------------------------|---------------------------------------------------|
| empirical formula                            | C <sub>19</sub> H <sub>29</sub> NO <sub>4</sub> S |
| formula weight                               | 367.50                                            |
| crystal system                               | monoclinic                                        |
| space group                                  | P2 <sub>1</sub> (#4)                              |
| <i>a</i> , Å                                 | 7.8197(2)                                         |
| <i>b</i> , Å                                 | 12.3340(4)                                        |
| <i>c</i> , Å                                 | 10.2203(4)                                        |
| $\beta$ , °                                  | 97.015(2)                                         |
| <i>V</i> , Å <sup>3</sup>                    | 978.36(5)                                         |
| <i>Z</i>                                     | 2                                                 |
| <i>D</i> <sub>calc</sub> , g/cm <sup>3</sup> | 1.247                                             |
| <i>T</i> , °C                                | −150                                              |
| $\mu$ (CuK $\alpha$ ), cm <sup>−1</sup>      | 16.537                                            |
| no. of reflns measured                       | 10503                                             |
| no. of reflns obsd                           | 3210                                              |
| no. of reflns variable                       | 228                                               |
| R (All reflections)                          | 0.0404                                            |
| R <sub>w</sub> (All reflections)             | 0.0883                                            |
| Goodness of Fit                              | 1.070                                             |

The crystal structure has been deposited at the Cambridge Crystallographic Data Centre (CCDC 772683). The data can be obtained free of charge via the Internet at [www.ccdc.cam.ac.uk/conts/retrieving.html](http://www.ccdc.cam.ac.uk/conts/retrieving.html).

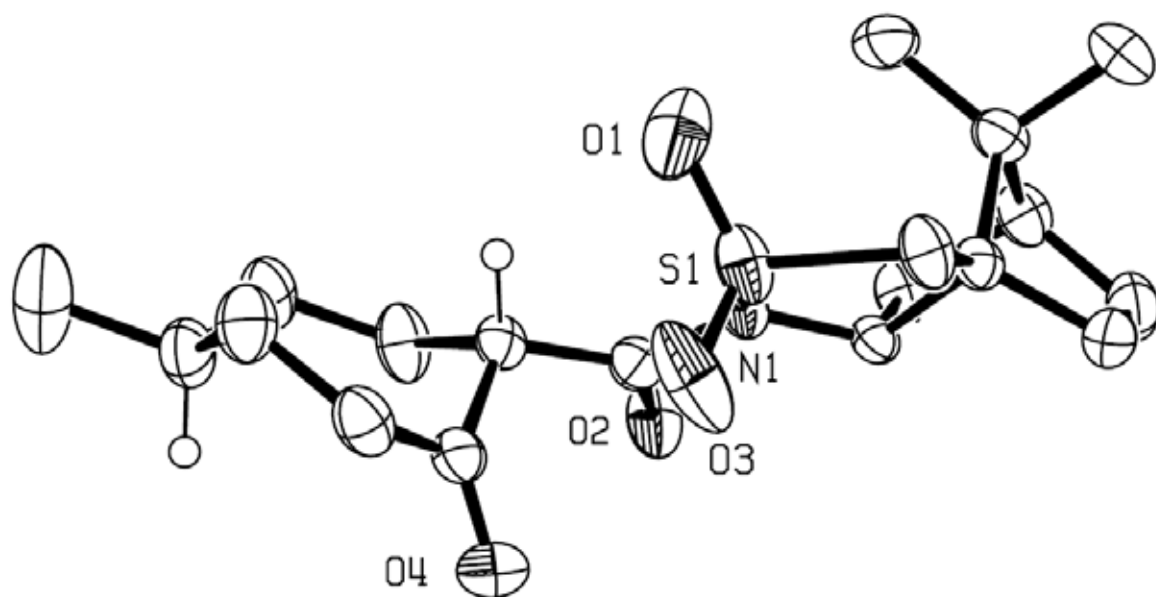

**X-ray crystallographic analysis of *N*-[(2*S*,5*R*)-1-oxo-5-(*tert*-butyldimethylsiloxy)-cycloheptan-2-carbonyl] (+)-camphorsultam (5e).**

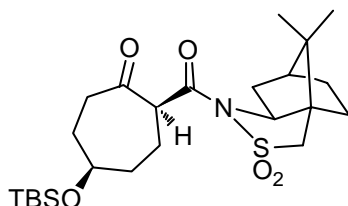

The product was recrystallized from hexane/CH<sub>2</sub>Cl<sub>2</sub>. The single crystal was mounted on a MicroMesh<sup>TM</sup> (MiTeGen). Data of X-ray diffraction were collected by a Rigaku RAXIS-RAPID Imaging Plate two-dimensional area detector using graphite-monochromated CuKα ( $\lambda = 1.54187 \text{ \AA}$ ) to a maximum  $2\theta$  value of  $136.5^\circ$ . The crystal structure was solved by the direct methods and refined by the full-matrix least squares using the program SHELXL-97.<sup>5</sup> All non-hydrogen atoms were refined anisotropically. Hydrogen atoms were refined by using the riding model. The crystallographic data were summarized in the following table.

|                                              |                                                     |
|----------------------------------------------|-----------------------------------------------------|
| empirical formula                            | C <sub>24</sub> H <sub>41</sub> NO <sub>5</sub> SSi |
| formula weight                               | 483.74                                              |
| crystal system                               | orthorhombic                                        |
| space group                                  | P2 <sub>1</sub> 2 <sub>1</sub> 2 <sub>1</sub> (#19) |
| <i>a</i> , Å                                 | 11.9185(2)                                          |
| <i>b</i> , Å                                 | 16.6964(3)                                          |
| <i>c</i> , Å                                 | 26.4700(5)                                          |
| <i>V</i> , Å <sup>3</sup>                    | 5267.42(17)                                         |
| <i>Z</i>                                     | 8                                                   |
| <i>D</i> <sub>calc</sub> , g/cm <sup>3</sup> | 1.220                                               |
| <i>T</i> , °C                                | −150                                                |
| $\mu$ (CuKα), cm <sup>−1</sup>               | 17.957                                              |
| no. of reflns measured                       | 56765                                               |
| no. of reflns obsd                           | 9633                                                |
| no. of reflns variable                       | 578                                                 |
| R (All reflections)                          | 0.0501                                              |
| R <sub>w</sub> (All reflections)             | 0.1081                                              |
| Goodness of Fit                              | 1.090                                               |

The crystal structure has been deposited at the Cambridge Crystallographic Data Centre (CCDC 772684). The data can be obtained free of charge via the Internet at [www.ccdc.cam.ac.uk/conts/retrieving.html](http://www.ccdc.cam.ac.uk/conts/retrieving.html).

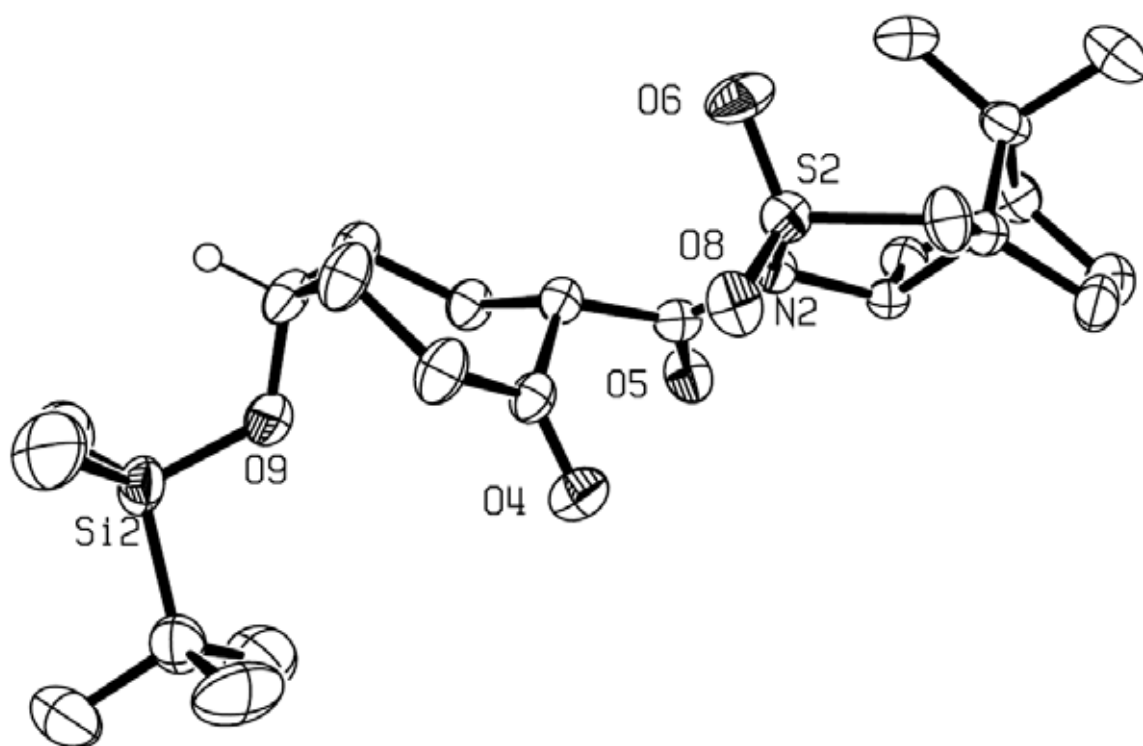

**X-ray crystallographic analysis of *N*-[(2*S*,5*R*)-1-oxo-5-methyl-5-trimethylsiloxy-cycloheptan-2-carbonyl] (+)-camphorsultam (**5f**).**

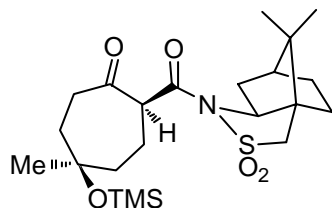

The product was recrystallized from hexane/CH<sub>2</sub>Cl<sub>2</sub>. The single crystal was mounted on a MicroMesh<sup>TM</sup> (MiTeGen). Data of X-ray diffraction were collected by a Rigaku RAXIS-RAPID Imaging Plate two-dimensional area detector using graphite-monochromated CuKα ( $\lambda = 1.54187 \text{ \AA}$ ) to a maximum  $2\theta$  value of  $136.5^\circ$ . The crystal structure was solved by the direct methods and refined by the full-matrix least squares using the program SHELXL-97.<sup>5</sup> All non-hydrogen atoms were refined anisotropically. Hydrogen atoms were refined by using the riding model. The crystallographic data were summarized in the following table.

|                                              |                                                     |
|----------------------------------------------|-----------------------------------------------------|
| empirical formula                            | C <sub>22</sub> H <sub>37</sub> NO <sub>5</sub> SSi |
| formula weight                               | 455.68                                              |
| crystal system                               | monoclinic                                          |
| space group                                  | P2 <sub>1</sub> (#4)                                |
| <i>a</i> , Å                                 | 9.7818(2)                                           |
| <i>b</i> , Å                                 | 11.7037(2)                                          |
| <i>c</i> , Å                                 | 10.7979(2)                                          |
| $\beta$ , °                                  | 102.0685(12)                                        |
| <i>V</i> , Å <sup>3</sup>                    | 1208.85(4)                                          |
| <i>Z</i>                                     | 2                                                   |
| <i>D</i> <sub>calc</sub> , g/cm <sup>3</sup> | 1.252                                               |
| <i>T</i> , °C                                | −150                                                |
| $\mu$ (CuKα), cm <sup>−1</sup>               | 19.259                                              |
| no. of reflns measured                       | 12589                                               |
| no. of reflns obsd                           | 4260                                                |
| no. of reflns variable                       | 272                                                 |
| R (All reflections)                          | 0.0465                                              |
| R <sub>w</sub> (All reflections)             | 0.0927                                              |
| Goodness of Fit                              | 1.009                                               |

The crystal structure has been deposited at the Cambridge Crystallographic Data Centre (CCDC 772685). The data can be obtained free of charge via the Internet at [www.ccdc.cam.ac.uk/conts/retrieving.html](http://www.ccdc.cam.ac.uk/conts/retrieving.html).

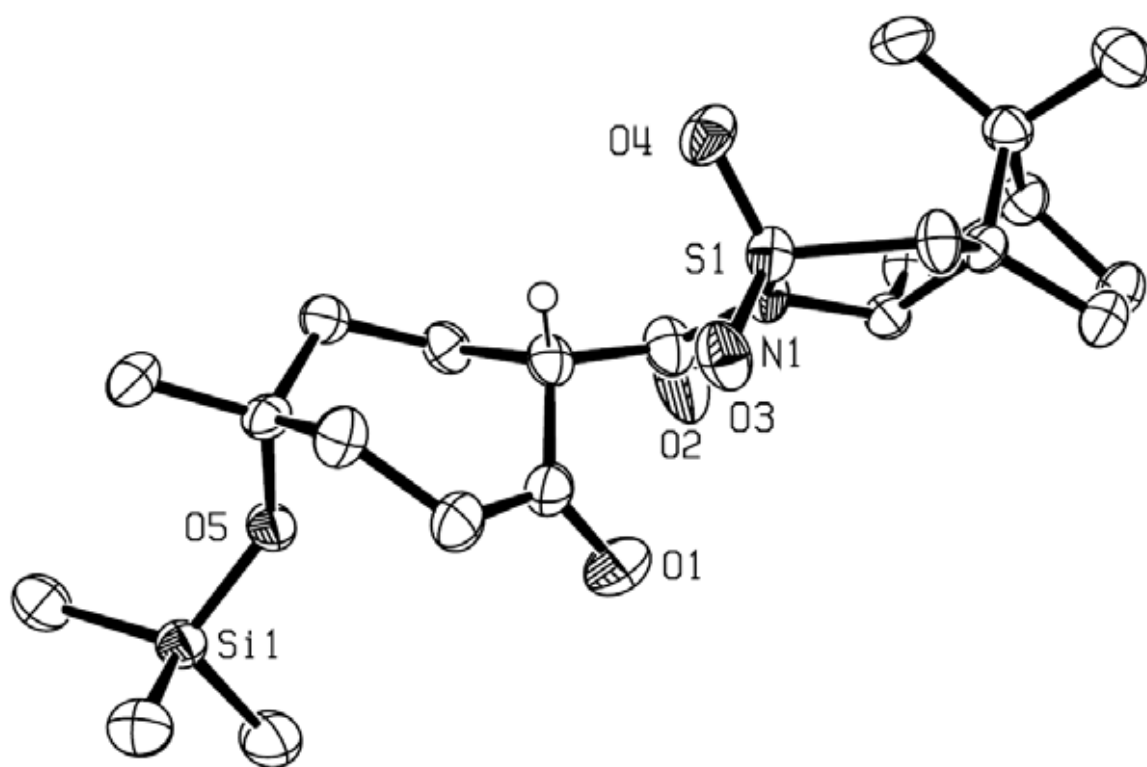

**X-ray crystallographic analysis of *N*-[(2*S*,4*S*,6*R*)-1-oxo-4,6-dimethylcycloheptan-2-carbonyl] (+)-camphorsultam (**5h**).**

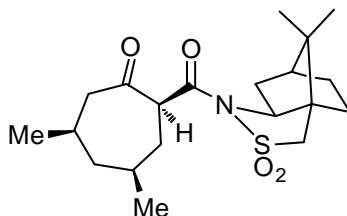

The product was recrystallized from hexane/CH<sub>2</sub>Cl<sub>2</sub>. The single crystal was mounted on a MicroMesh<sup>TM</sup> (MiTeGen). Data of X-ray diffraction were collected by a Rigaku RAXIS-RAPID Imaging Plate two-dimensional area detector using graphite-monochromated CuK $\alpha$  ( $\lambda$  = 1.54187 Å) to a maximum  $2\theta$  value of 136.5°. The crystal structure was solved by the direct methods and refined by the full-matrix least squares using the program SHELXL-97.<sup>5</sup> All non-hydrogen atoms were refined anisotropically. Hydrogen atoms were refined by using the riding model. The crystallographic data were summarized in the following table.

|                                              |                                                     |
|----------------------------------------------|-----------------------------------------------------|
| empirical formula                            | C <sub>20</sub> H <sub>31</sub> NO <sub>4</sub> S   |
| formula weight                               | 381.53                                              |
| crystal system                               | orthorhombic                                        |
| space group                                  | P2 <sub>1</sub> 2 <sub>1</sub> 2 <sub>1</sub> (#19) |
| <i>a</i> , Å                                 | 11.1745(2)                                          |
| <i>b</i> , Å                                 | 12.9656(2)                                          |
| <i>c</i> , Å                                 | 13.4284(3)                                          |
| <i>V</i> , Å <sup>3</sup>                    | 1945.57(6)                                          |
| <i>Z</i>                                     | 4                                                   |
| <i>D</i> <sub>calc</sub> , g/cm <sup>3</sup> | 1.302                                               |
| <i>T</i> , °C                                | −150                                                |
| $\mu$ (CuK $\alpha$ ), cm <sup>−1</sup>      | 16.819                                              |
| no. of reflns measured                       | 20344                                               |
| no. of reflns obsd                           | 3543                                                |
| no. of reflns variable                       | 236                                                 |
| R (All reflections)                          | 0.1266                                              |
| R <sub>w</sub> (All reflections)             | 0.1956                                              |
| Goodness of Fit                              | 1.188                                               |

The crystal structure has been deposited at the Cambridge Crystallographic Data Centre (CCDC 772686). The data can be obtained free of charge via the Internet at [www.ccdc.cam.ac.uk/conts/retrieving.html](http://www.ccdc.cam.ac.uk/conts/retrieving.html).

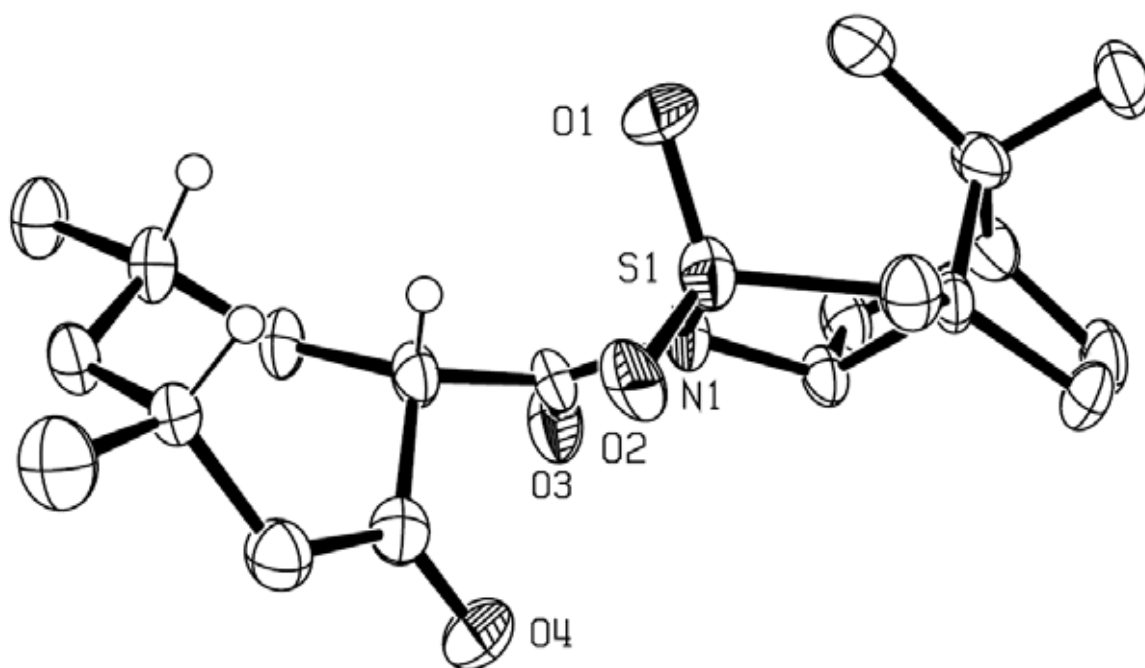

**X-ray crystallographic analysis of *N*-[(2*S*,6*R*)-1-oxo-6-methylcycloheptan-2-carbonyl] (+)-camphorsultam (7a).**

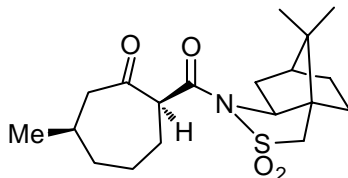

The product was recrystallized from hexane/CH<sub>2</sub>Cl<sub>2</sub>. The single crystal was mounted on a MicroMesh<sup>TM</sup> (MiTeGen). Data of X-ray diffraction were collected by a Rigaku RAXIS-RAPID Imaging Plate two-dimensional area detector using graphite-monochromated CuKα ( $\lambda = 1.54187 \text{ \AA}$ ) to a maximum  $2\theta$  value of  $136.5^\circ$ . The crystal structure was solved by the direct methods and refined by the full-matrix least squares using the program SHELXL-97.<sup>5</sup> All non-hydrogen atoms were refined anisotropically. Hydrogen atoms were refined by using the riding model. The crystallographic data were summarized in the following table.

|                                              |                                                     |
|----------------------------------------------|-----------------------------------------------------|
| empirical formula                            | C <sub>19</sub> H <sub>29</sub> NO <sub>4</sub> S   |
| formula weight                               | 367.50                                              |
| crystal system                               | orthorhombic                                        |
| space group                                  | P2 <sub>1</sub> 2 <sub>1</sub> 2 <sub>1</sub> (#19) |
| <i>a</i> , Å                                 | 12.6668(2)                                          |
| <i>b</i> , Å                                 | 13.3989(2)                                          |
| <i>c</i> , Å                                 | 11.1466(2)                                          |
| <i>V</i> , Å <sup>3</sup>                    | 1891.83(5)                                          |
| <i>Z</i>                                     | 4                                                   |
| <i>D</i> <sub>calc</sub> , g/cm <sup>3</sup> | 1.290                                               |
| <i>T</i> , °C                                | −150                                                |
| $\mu$ (CuKα), cm <sup>−1</sup>               | 17.104                                              |
| no. of reflns measured                       | 19346                                               |
| no. of reflns obsd                           | 3423                                                |
| no. of reflns variable                       | 227                                                 |
| R (All reflections)                          | 0.0344                                              |
| R <sub>w</sub> (All reflections)             | 0.0852                                              |
| Goodness of Fit                              | 1.138                                               |

The crystal structure has been deposited at the Cambridge Crystallographic Data Centre (CCDC 772688). The data can be obtained free of charge via the Internet at [www.ccdc.cam.ac.uk/conts/retrieving.html](http://www.ccdc.cam.ac.uk/conts/retrieving.html).

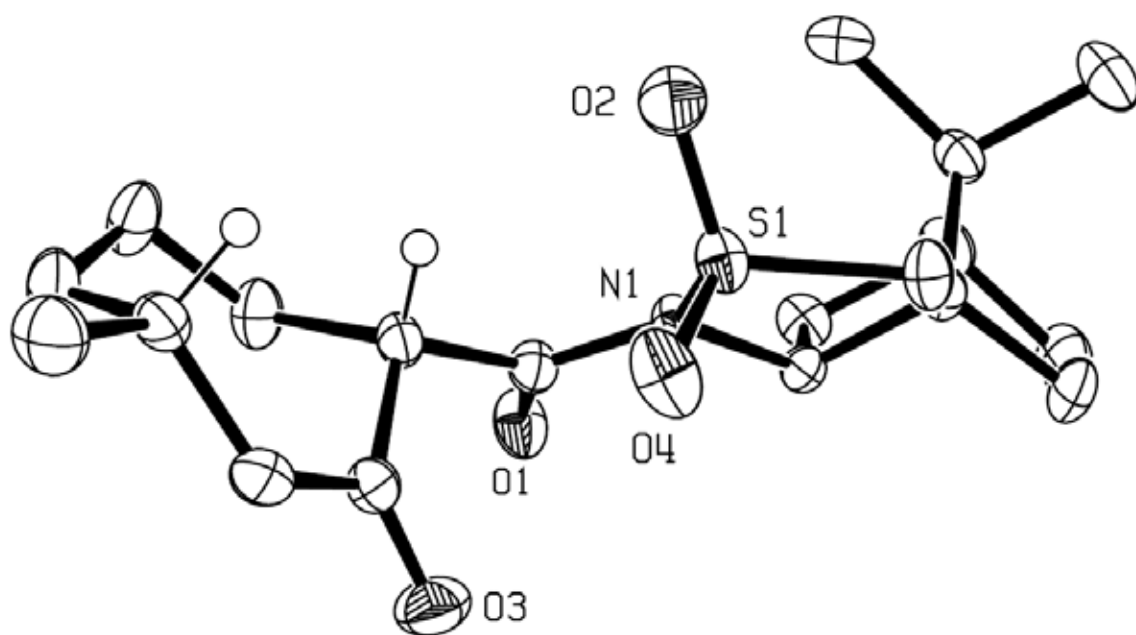

**X-ray crystallographic analysis of *N*-[(2*R*,4*R*)-1-oxo-4-methylcycloheptan-2-carbonyl] (-)-camphorsultam (7b).**

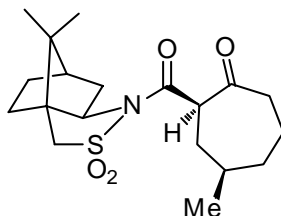

The product was recrystallized from hexane/CH<sub>2</sub>Cl<sub>2</sub>. The single crystal was mounted on a MicroMesh<sup>TM</sup> (MiTeGen). Data of X-ray diffraction were collected by a Rigaku RAXIS-RAPID Imaging Plate two-dimensional area detector using graphite-monochromated CuK $\alpha$  ( $\lambda$  = 1.54187 Å) to a maximum  $2\theta$  value of 136.5°. The crystal structure was solved by the direct methods and refined by the full-matrix least squares using the program SHELXL-97.<sup>5</sup> All non-hydrogen atoms were refined anisotropically. Hydrogen atoms were refined by using the riding model. The crystallographic data were summarized in the following table.

|                                              |                                                     |
|----------------------------------------------|-----------------------------------------------------|
| empirical formula                            | C <sub>19</sub> H <sub>29</sub> NO <sub>4</sub> S   |
| formula weight                               | 367.50                                              |
| crystal system                               | orthorhombic                                        |
| space group                                  | P2 <sub>1</sub> 2 <sub>1</sub> 2 <sub>1</sub> (#19) |
| <i>a</i> , Å                                 | 8.22600(15)                                         |
| <i>b</i> , Å                                 | 11.6586(2)                                          |
| <i>c</i> , Å                                 | 19.6399(4)                                          |
| <i>V</i> , Å <sup>3</sup>                    | 1883.54(6)                                          |
| <i>Z</i>                                     | 4                                                   |
| <i>D</i> <sub>calc</sub> , g/cm <sup>3</sup> | 1.296                                               |
| <i>T</i> , °C                                | –150                                                |
| $\mu$ (CuK $\alpha$ ), cm <sup>–1</sup>      | 17.180                                              |
| no. of reflns measured                       | 19045                                               |
| no. of reflns obsd                           | 3425                                                |
| no. of reflns variable                       | 227                                                 |
| R (All reflections)                          | 0.0365                                              |
| R <sub>w</sub> (All reflections)             | 0.0864                                              |
| Goodness of Fit                              | 1.132                                               |

The crystal structure has been deposited at the Cambridge Crystallographic Data Centre (CCDC 772687). The data can be obtained free of charge via the Internet at [www.ccdc.cam.ac.uk/conts/retrieving.html](http://www.ccdc.cam.ac.uk/conts/retrieving.html).

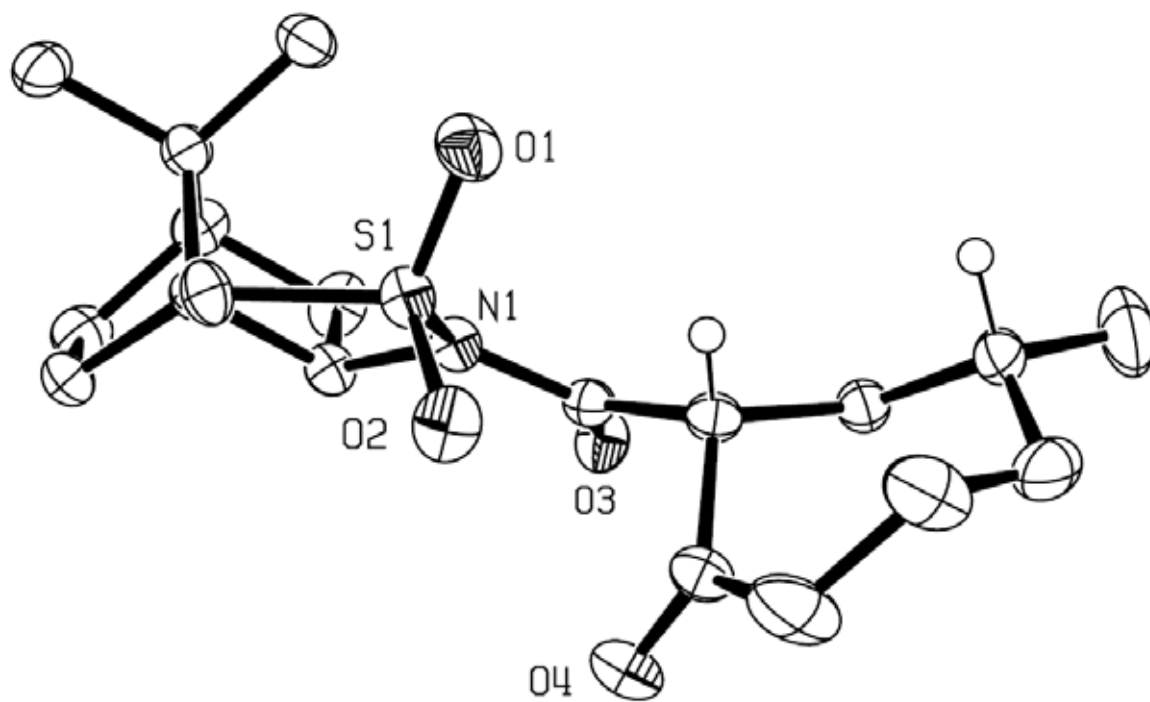

## X-ray crystallographic analysis of 9·CH<sub>3</sub>CN.

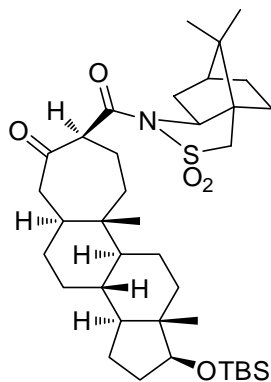

The product was recrystallized from CH<sub>3</sub>CN/CH<sub>2</sub>Cl<sub>2</sub>. The single crystal was mounted on a MicroMesh<sup>TM</sup> (MiTeGen). Data of X-ray diffraction were collected by a Rigaku RAXIS-RAPID Imaging Plate two-dimensional area detector using graphite-monochromated CuK $\alpha$  ( $\lambda$  = 1.54187 Å) to a maximum  $2\theta$  value of 136.5°. The crystal structure was solved by the direct methods and refined by the full-matrix least squares using the program SHELXL-97.<sup>5</sup> All non-hydrogen atoms were refined anisotropically. Hydrogen atoms were refined by using the riding model. The crystallographic data were summarized in the following table.

|                                              |                                                                   |
|----------------------------------------------|-------------------------------------------------------------------|
| empirical formula                            | C <sub>39</sub> H <sub>64</sub> N <sub>2</sub> O <sub>5</sub> SSi |
| formula weight                               | 701.09                                                            |
| crystal system                               | orthorhombic                                                      |
| space group                                  | P2 <sub>1</sub> 2 <sub>1</sub> 2 <sub>1</sub> (#19)               |
| <i>a</i> , Å                                 | 7.49798(16)                                                       |
| <i>b</i> , Å                                 | 12.6702(3)                                                        |
| <i>c</i> , Å                                 | 41.5163(9)                                                        |
| <i>V</i> , Å <sup>3</sup>                    | 3944.09(15)                                                       |
| <i>Z</i>                                     | 4                                                                 |
| <i>D</i> <sub>calc</sub> , g/cm <sup>3</sup> | 1.181                                                             |
| <i>T</i> , °C                                | −150                                                              |
| $\mu$ (CuK $\alpha$ ), cm <sup>−1</sup>      | 13.550                                                            |
| no. of reflns obsd                           | 7143                                                              |
| no. of reflns variable                       | 395                                                               |
| R (All reflections)                          | 0.0820                                                            |
| R <sub>w</sub> (All reflections)             | 0.2257                                                            |
| Goodness of Fit                              | 1.107                                                             |

The crystal structure has been deposited at the Cambridge Crystallographic Data Centre (CCDC 772689). The data can be obtained free of charge via the Internet at [www.ccdc.cam.ac.uk/conts/retrieving.html](http://www.ccdc.cam.ac.uk/conts/retrieving.html).

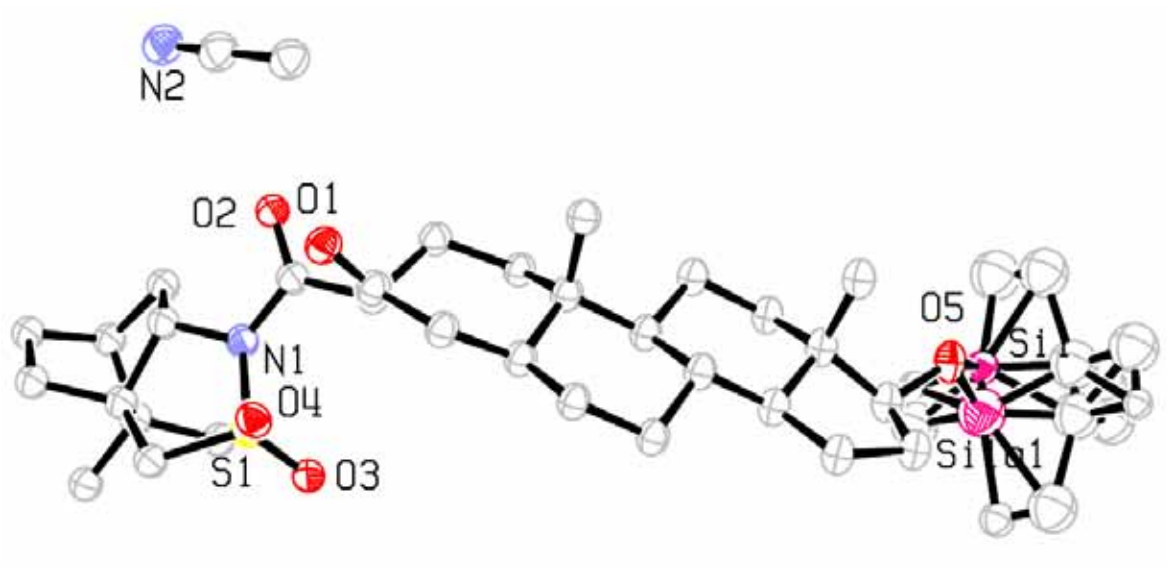

**X-ray crystallographic analysis of *N*-[(1*R*,2*S*)-1-hydroxycyclopentan-2-carbonyl] (+)-camphorsultam (10).**

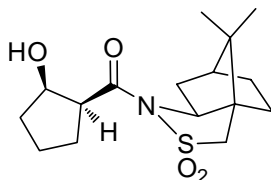

The product was recrystallized from hexane/CH<sub>2</sub>Cl<sub>2</sub>. The single crystal was mounted on a MicroMesh<sup>TM</sup> (MiTeGen). Data of X-ray diffraction were collected by a Rigaku RAXIS-RAPID Imaging Plate two-dimensional area detector using graphite-monochromated CuK $\alpha$  ( $\lambda$  = 1.54187 Å) to a maximum  $2\theta$  value of 136.5°. The crystal structure was solved by the direct methods and refined by the full-matrix least squares using the program SHELXL-97.<sup>5</sup> All non-hydrogen atoms were refined anisotropically. Hydrogen atoms were refined by using the riding model. The crystallographic data were summarized in the following table.

|                                              |                                                   |
|----------------------------------------------|---------------------------------------------------|
| empirical formula                            | C <sub>16</sub> H <sub>25</sub> NO <sub>4</sub> S |
| formula weight                               | 327.44                                            |
| crystal system                               | monoclinic                                        |
| space group                                  | P2 <sub>1</sub> (#4)                              |
| <i>a</i> , Å                                 | 7.7300(2)                                         |
| <i>b</i> , Å                                 | 21.7617(6)                                        |
| <i>c</i> , Å                                 | 9.9870(3)                                         |
| $\beta$ , °                                  | 90.343(2)                                         |
| <i>V</i> , Å <sup>3</sup>                    | 1679.97(9)                                        |
| <i>Z</i>                                     | 4                                                 |
| <i>D</i> <sub>calc</sub> , g/cm <sup>3</sup> | 18.613                                            |
| <i>T</i> , °C                                | −150                                              |
| $\mu$ (CuK $\alpha$ ), cm <sup>−1</sup>      | 18.613                                            |
| no. of reflns measured                       | 17491                                             |
| no. of reflns obsd                           | 5765                                              |
| no. of reflns variable                       | 399                                               |
| R (All reflections)                          | 0.1270                                            |
| R <sub>w</sub> (All reflections)             | 0.3501                                            |
| Goodness of Fit                              | 1.451                                             |

The crystal structure has been deposited at the Cambridge Crystallographic Data Centre (CCDC 772690). The data can be obtained free of charge via the Internet at [www.ccdc.cam.ac.uk/conts/retrieving.html](http://www.ccdc.cam.ac.uk/conts/retrieving.html).

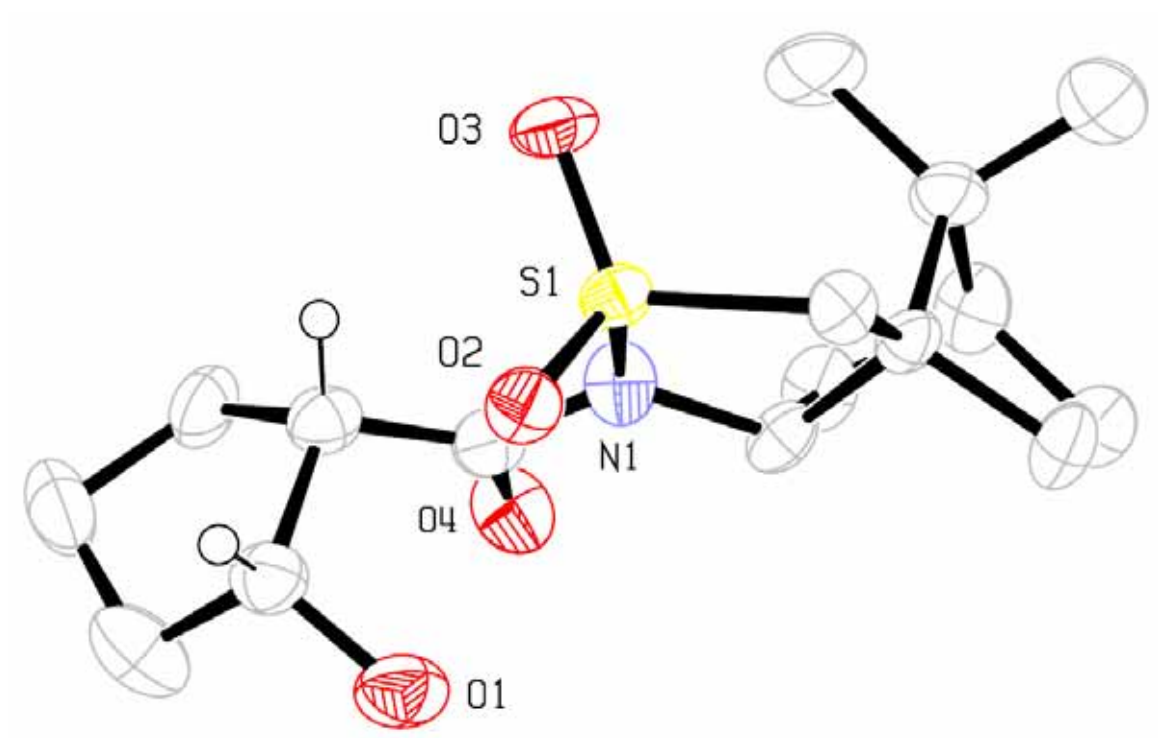

### Discussion on the mechanism of the enantiodiscrimination by camphorsultam.

In our previous report on the use of *N*- $\alpha$ -acyl camphorsultam (*J. Am. Chem. Soc.*, 2009, **131**, 11280.), we hypothesized the SO<sub>2</sub> moiety of camphorsultam shields one enantiotopic face. In the case of the *N*- $\alpha$ -diazoacetyl camphorsultam (+)-**1** bearing an  $\alpha$ -hydrogen atom, the O=C–C=N bond would preferentially form *s-cis* conformation to minimize the steric repulsion of the diazo moiety and camphorsultam.

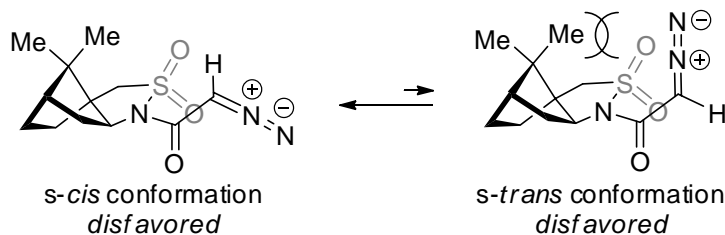

To (+)-**1** in the *s-cis* conformation, the Lewis acid-activated cyclohexanone approaches from the less hindered side of the diazo carbon (from the top in the description below) to give the diazonium intermediate **I**. The migration of the carbon atom from this intermediate would proceed via the inversion of the configuration to generate the ring expanded product **5** with the stereochemistry actually observed in this research.

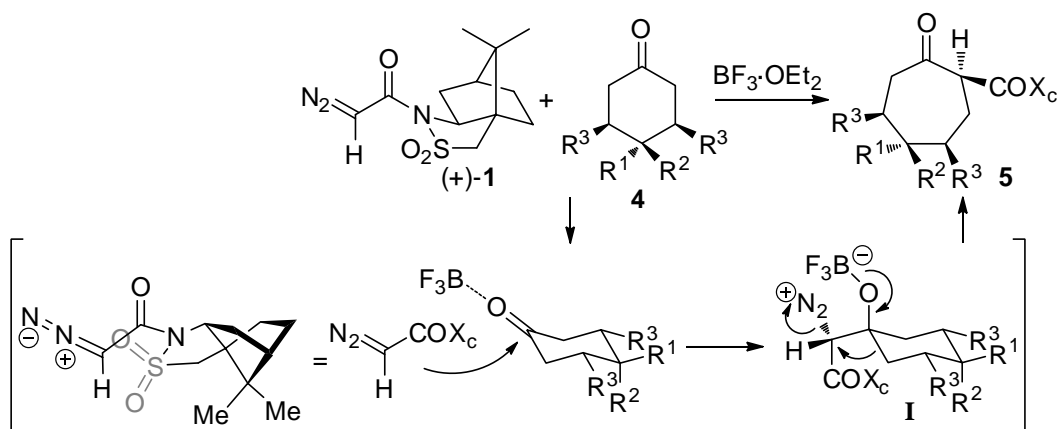

## References.

- (1) T. Toma, J. Shimokawa, and T. Fukuyama, *Org. Lett.*, 2007, **9**, 3195.
- (2) J. B. Sweeney, A. A. Cantrill, A. B. McLaren, and S. Thobhani, *Tetrahedron*, 2006, **62**, 3681.
- (3) M. Ma, L. Peng, C. Li, X. Zhang, and J. Wang, *J. Am. Chem. Soc.*, 2005, **127**, 15016.
- (4) (a) A. J. Frontier, S. J. Danishefsky, G. A. Koppel, and D. Meng, *Tetrahedron*, 1998, **54**, 12721; (b) R. A. Glennon, S.-s. Hong, M. Bondarev, H. Law, M. Dukat, S. Rakhit, P. Power, E. Fan, D. Kinneau, R. Kamboj, M. Teitler, K. Herrick-Davis, and C. Smith, *J. Med. Chem.*, 1996, **36**, 314; (c) A. Malapelle, A. Coslovi, G. Doisneau, and J.-m. Beau, *J. Org. Chem.*, 2007, **72**, 3145; (d) T. Hashimoto, Y. Naganawa, and K. Maruoka, *J. Am. Chem. Soc.*, 2009, **131**, 6614; (e) C. A. G. M. Weijers, P. M. Könst, M. C. R. Franssen, and E. J. R. Sudhölter, *Org. Biomol. Chem.*, 2007, **5**, 3106; (f) D. S. Ressay, D. V. Velde, and J. Aubé, *J. Org. Chem.*, 2004, **69**, 1716; (g) C. H. Heathcock, and S. C. Smith, *J. Org. Chem.*, 1994, **59**, 6828.
- (5) G. M. Sheldrick, SHELX-97: Program for Crystal Structure Refinement, University of Gottingen, Germany, 1997.

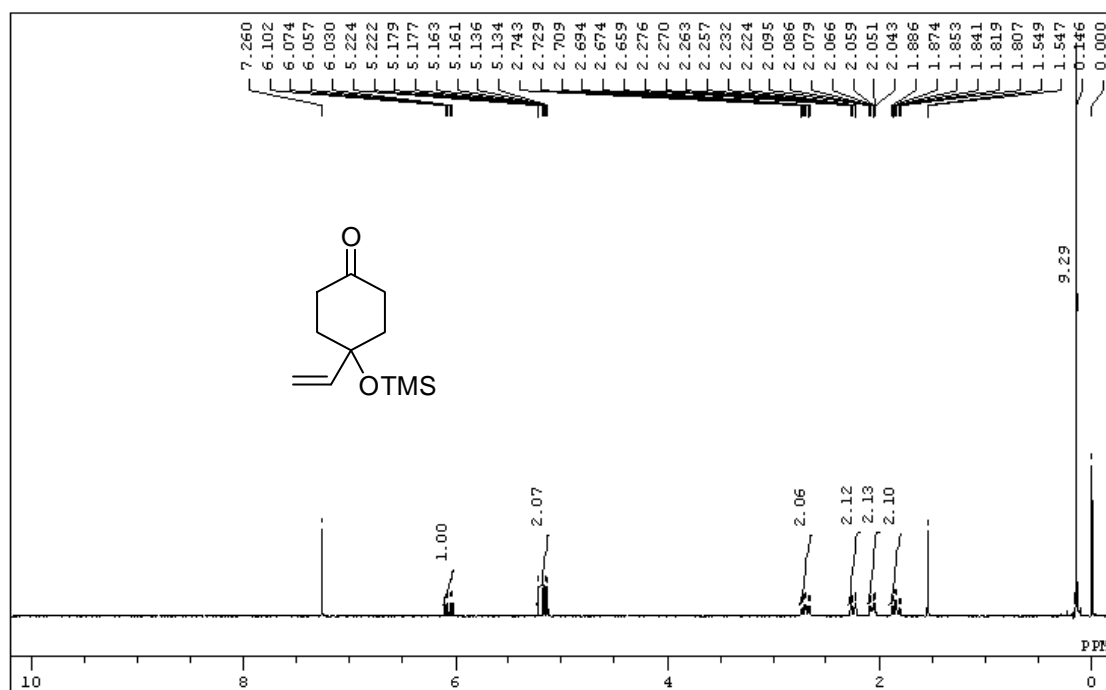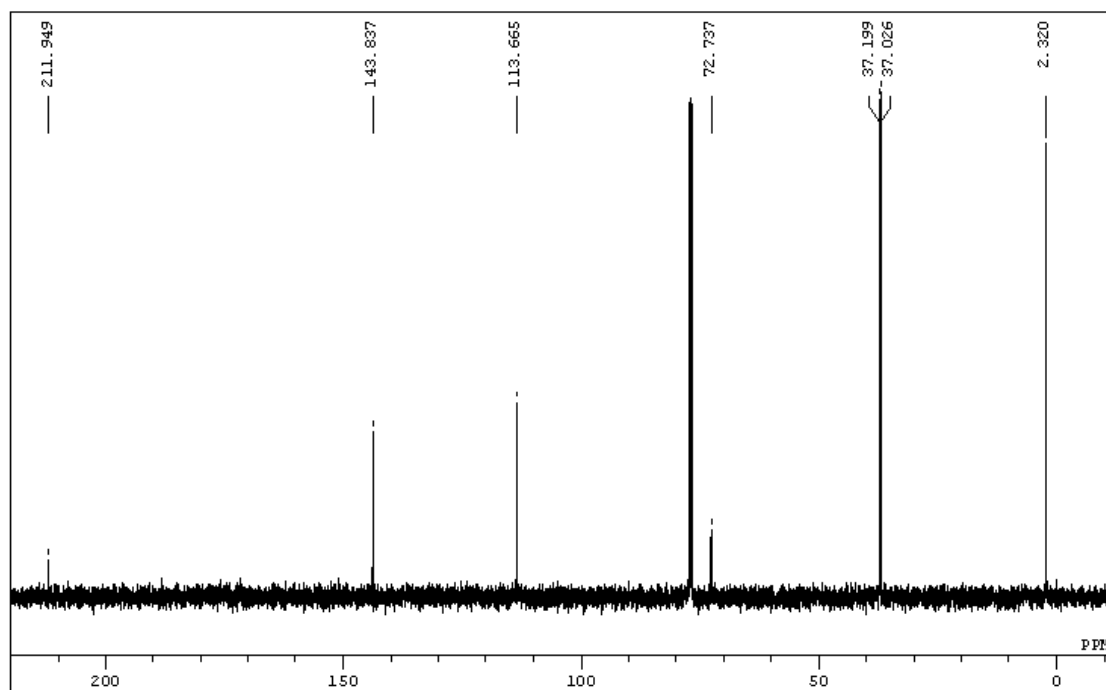

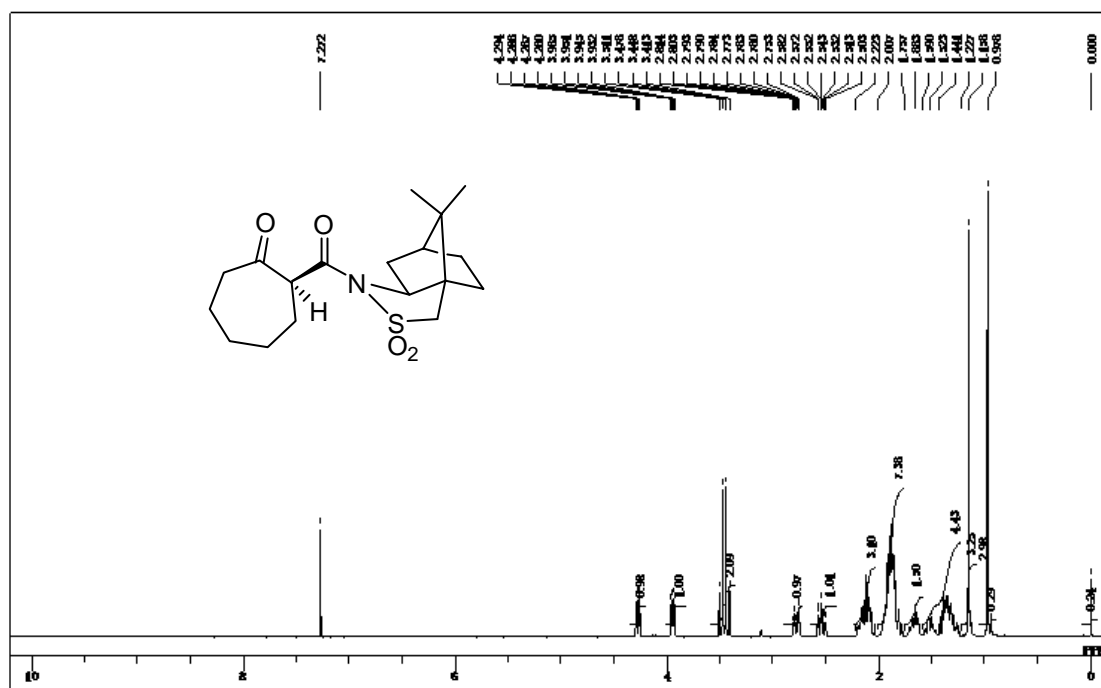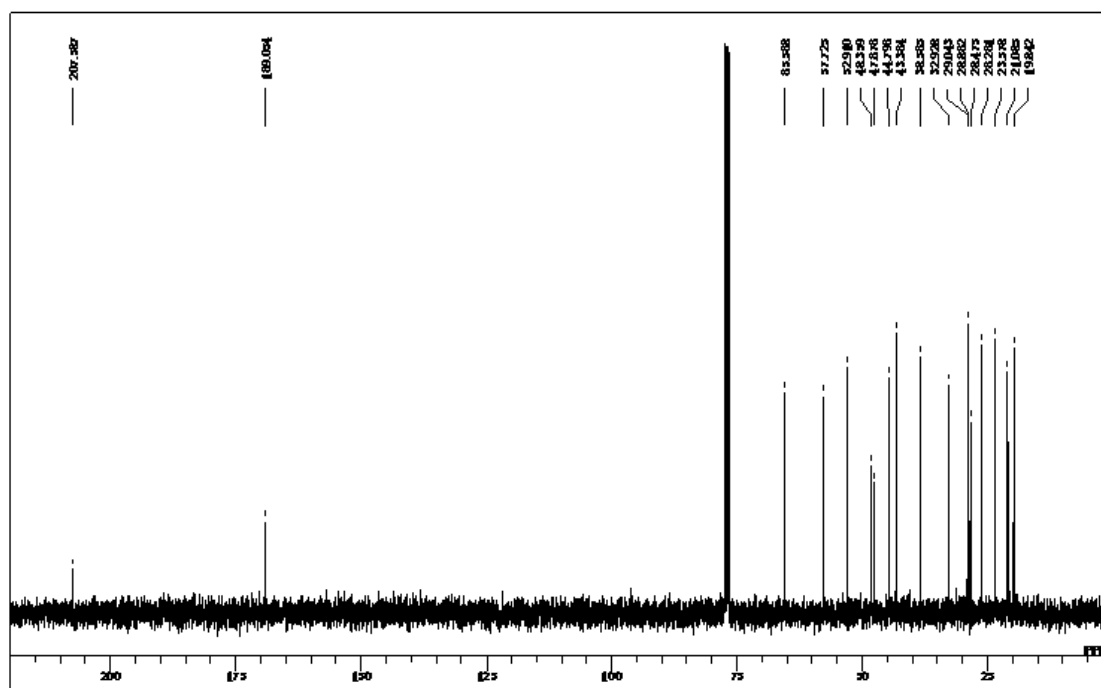

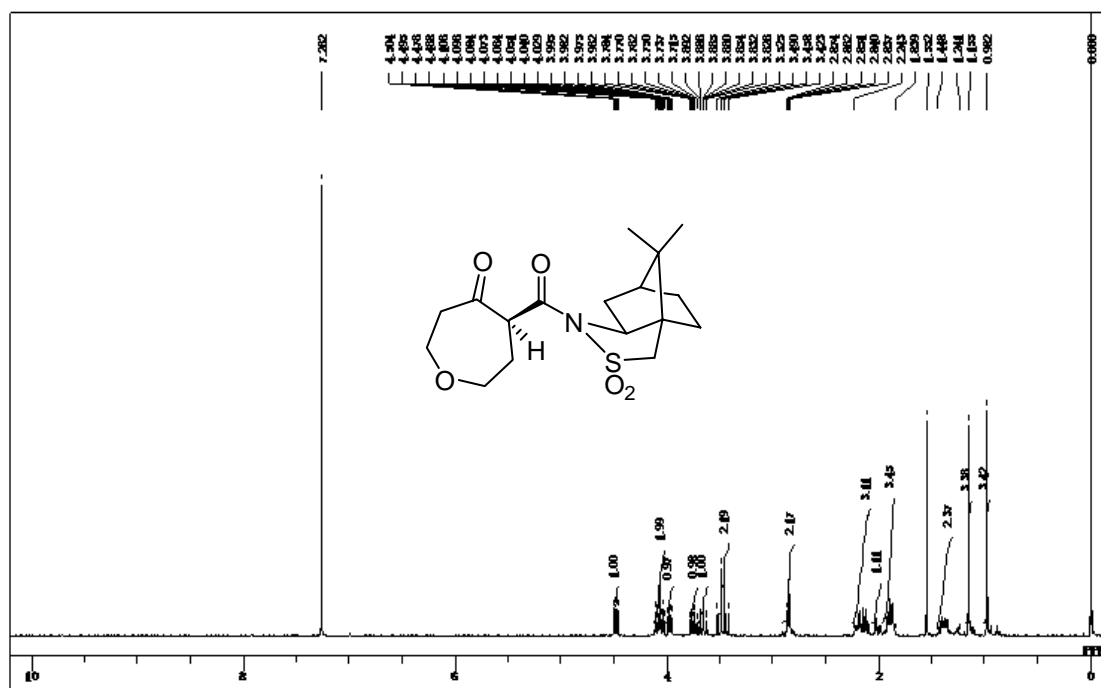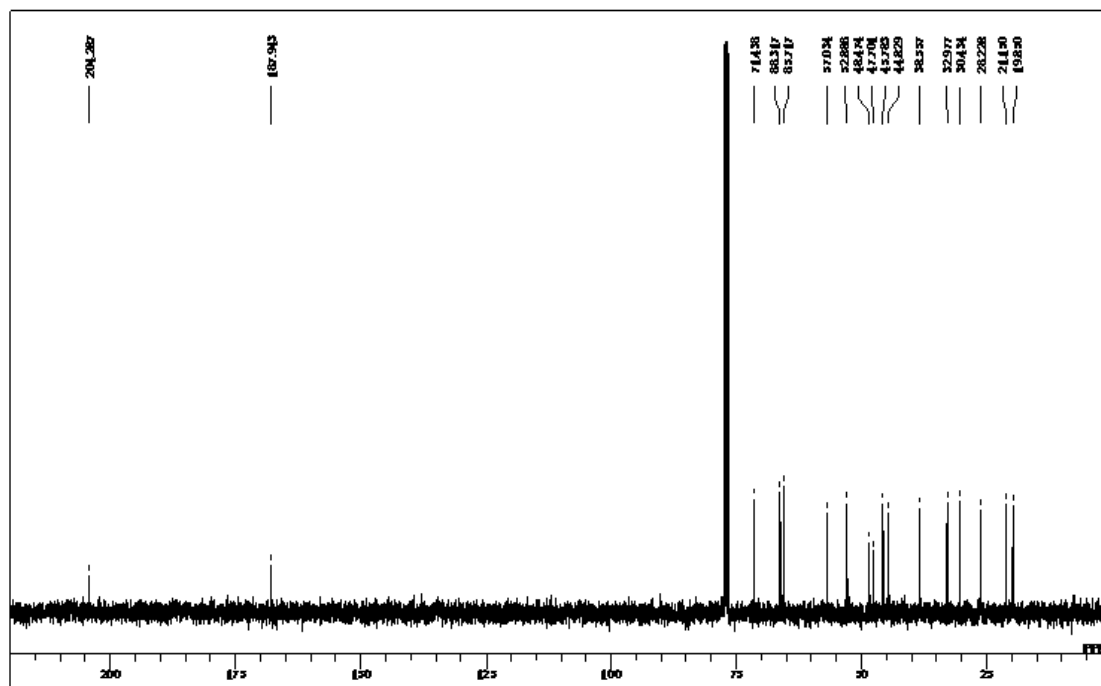

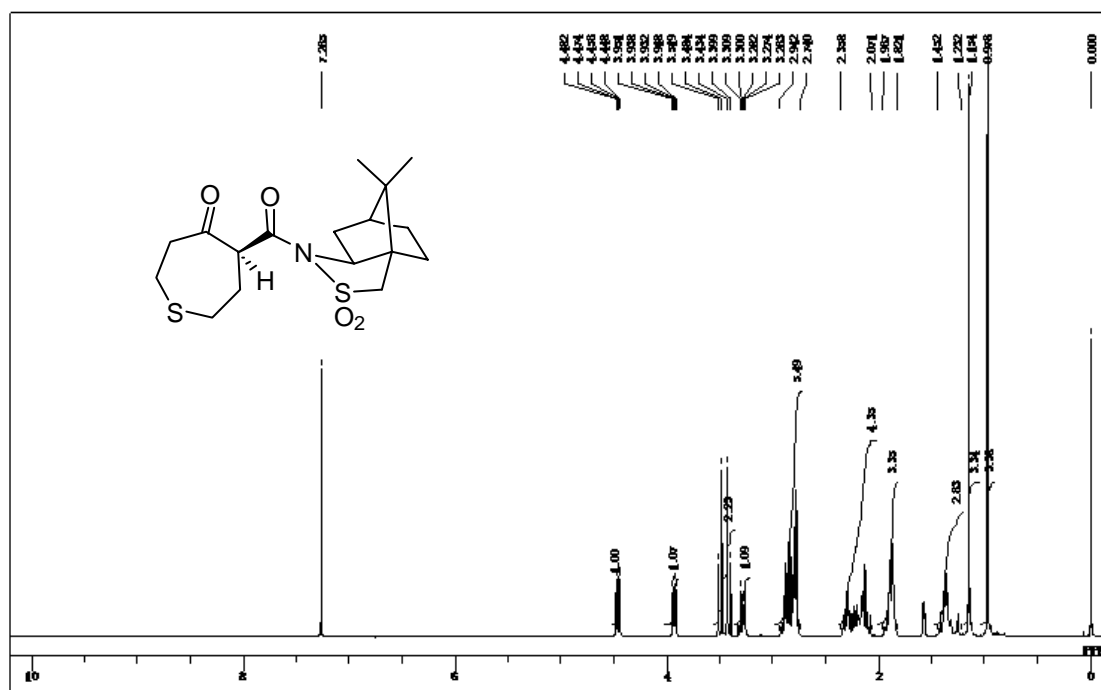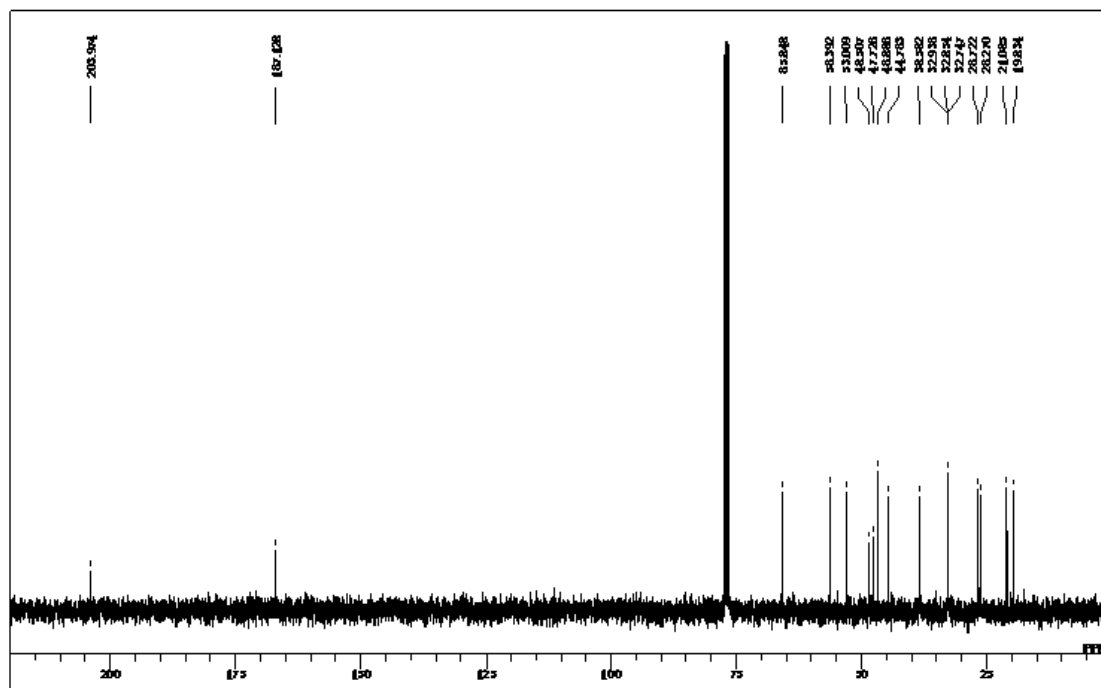

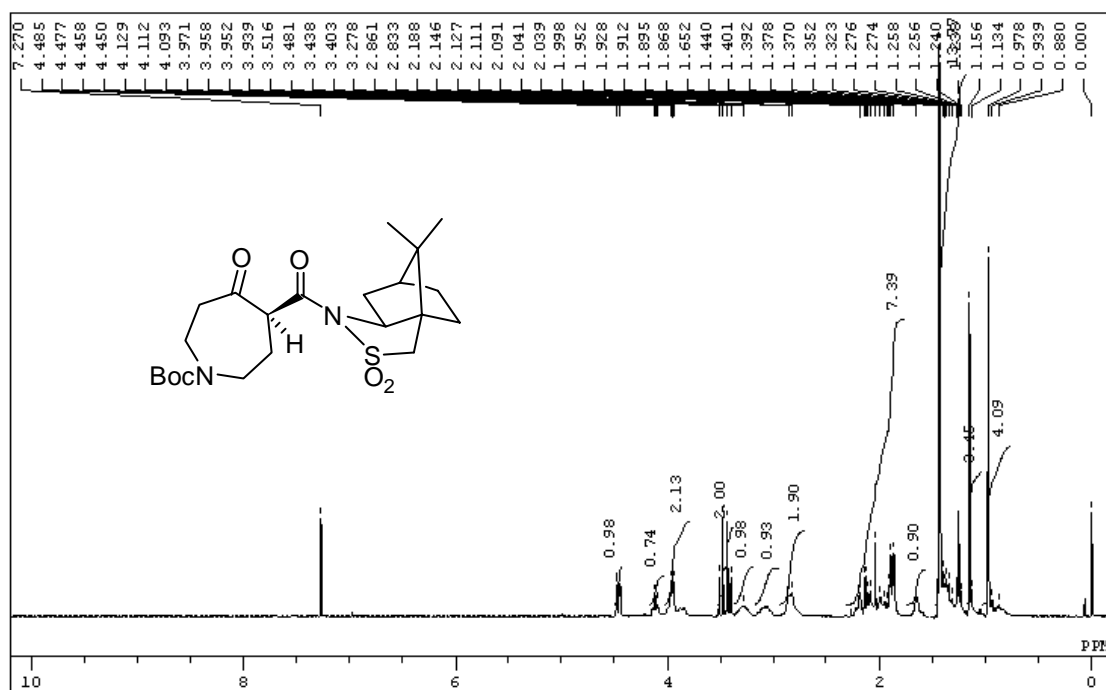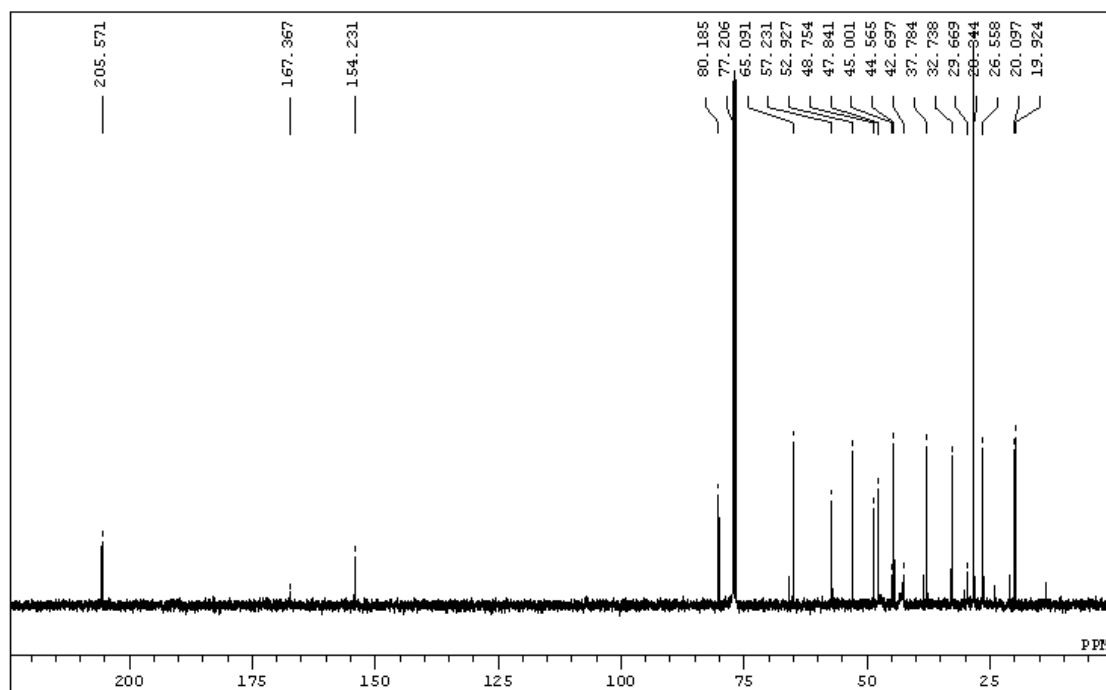

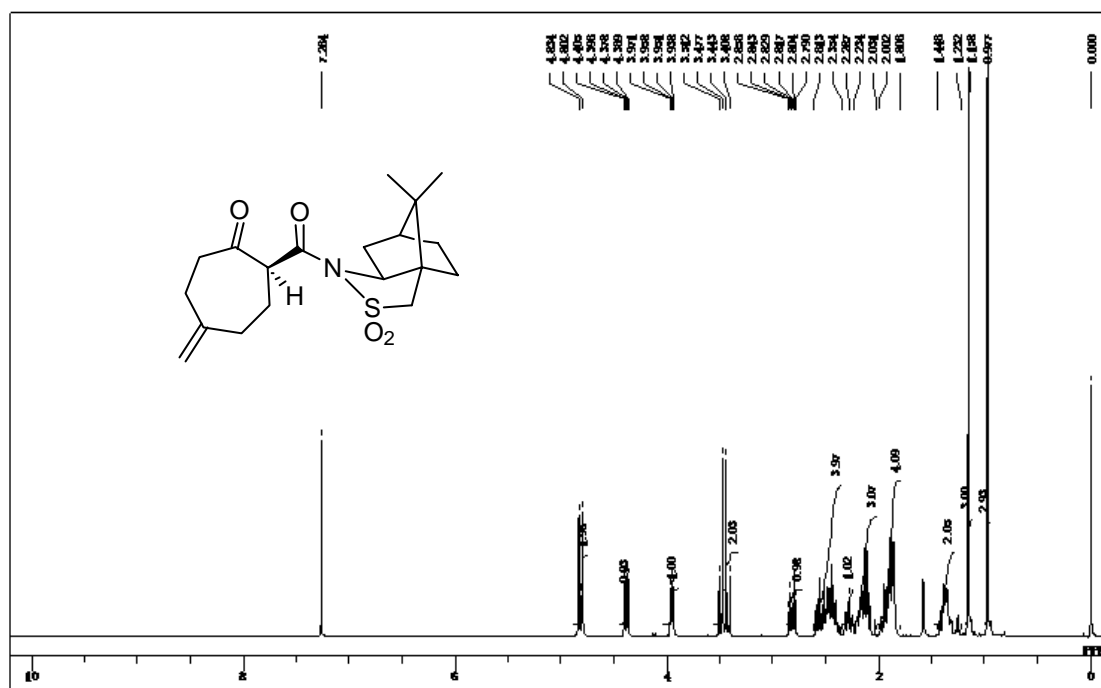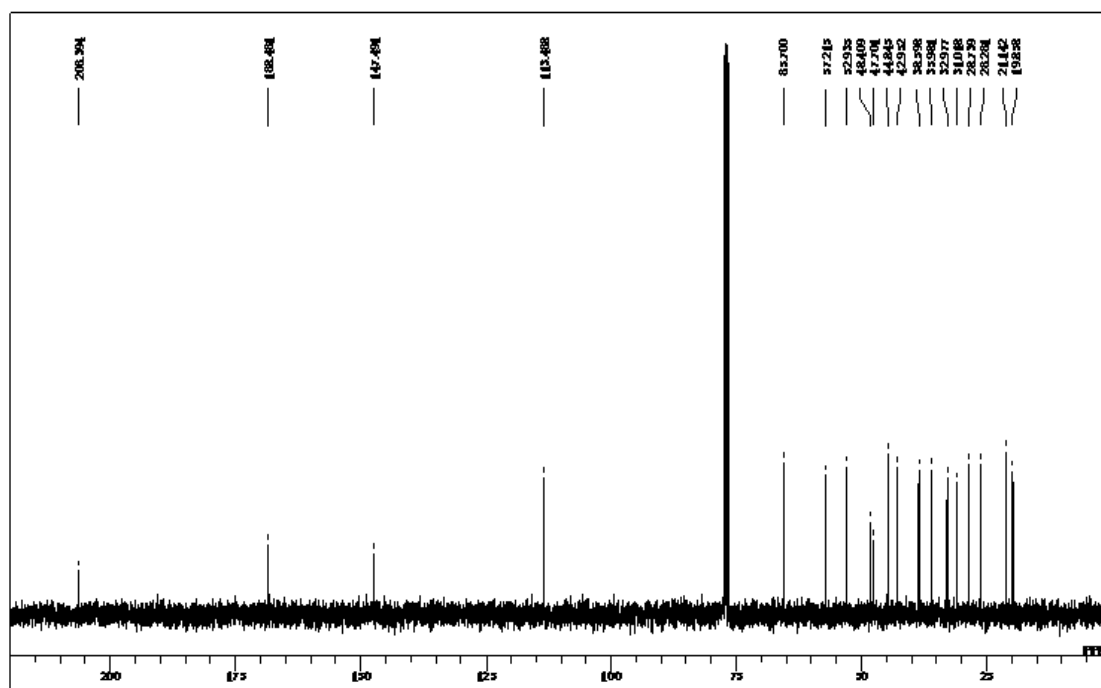

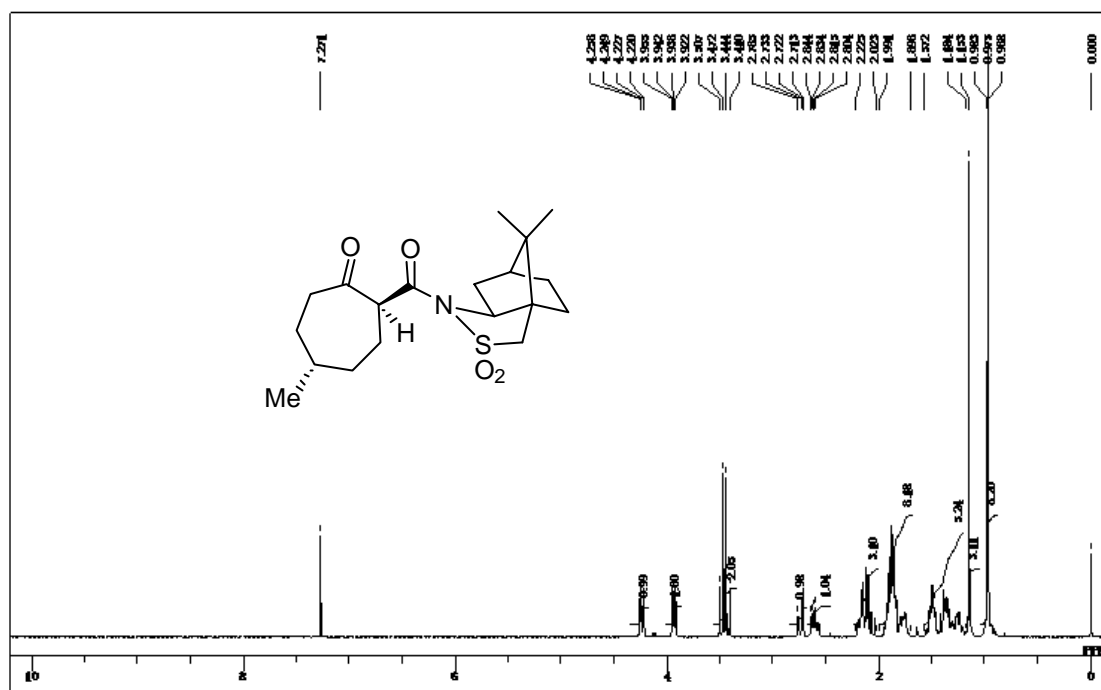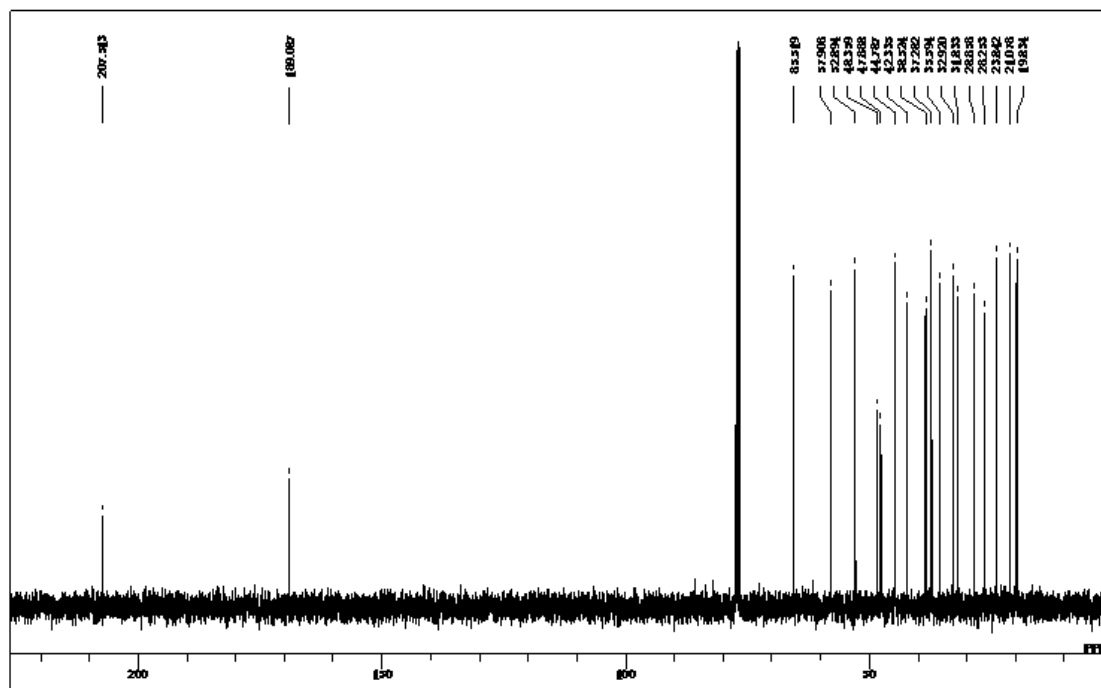

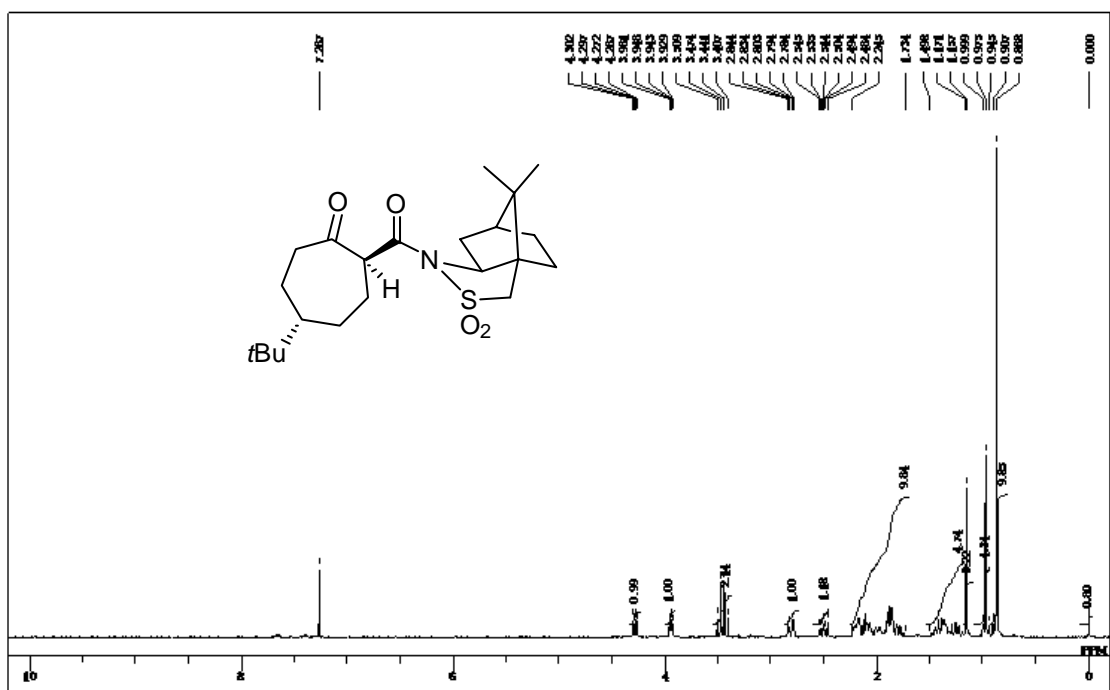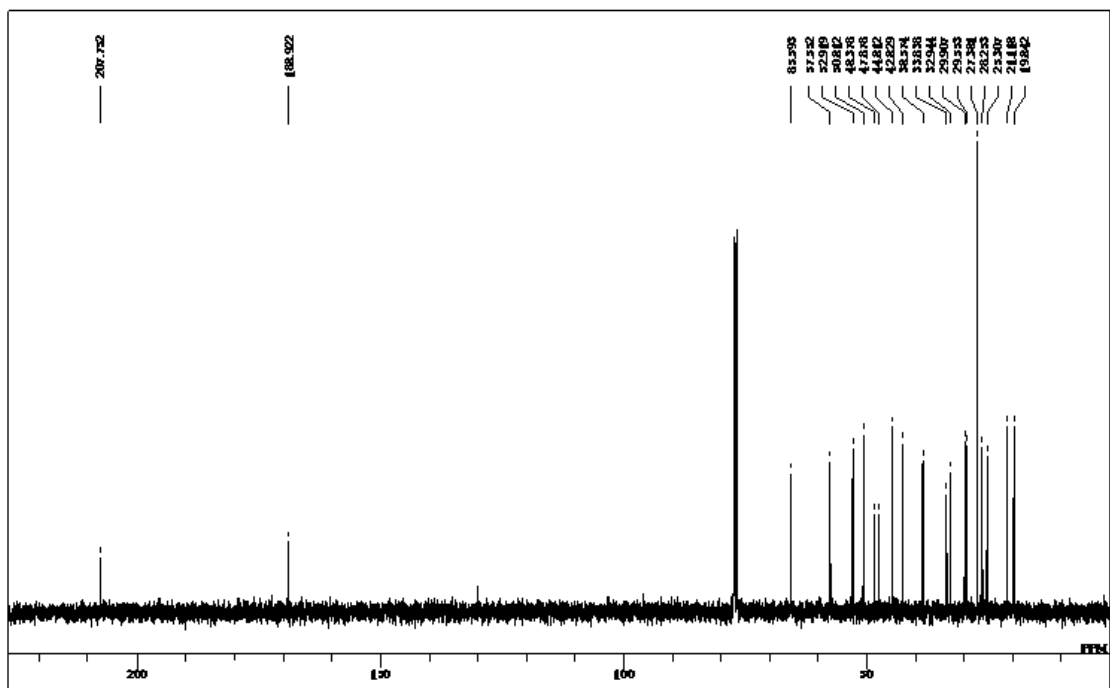



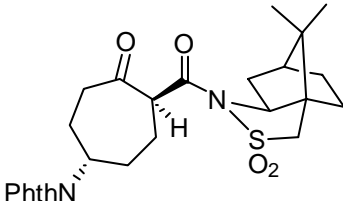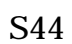

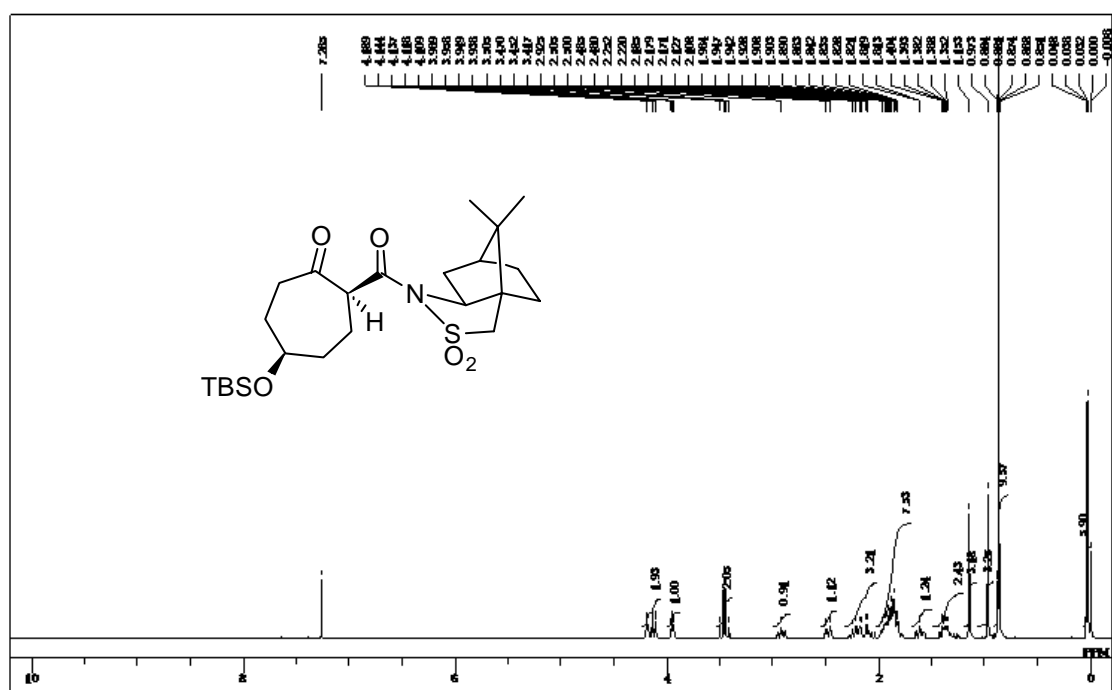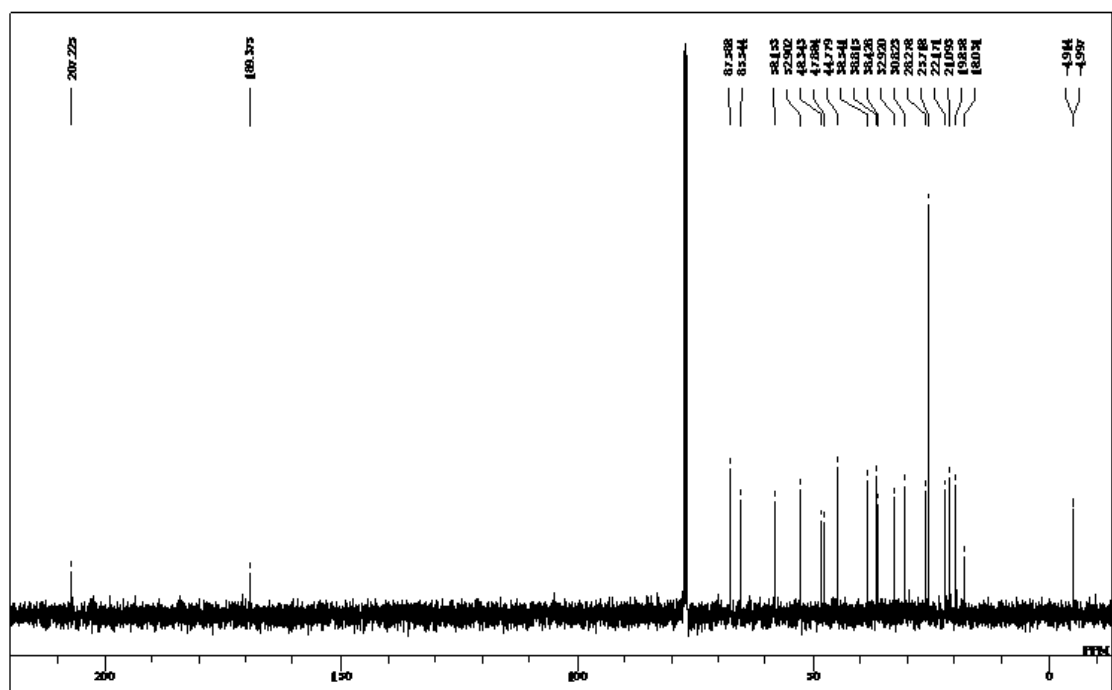

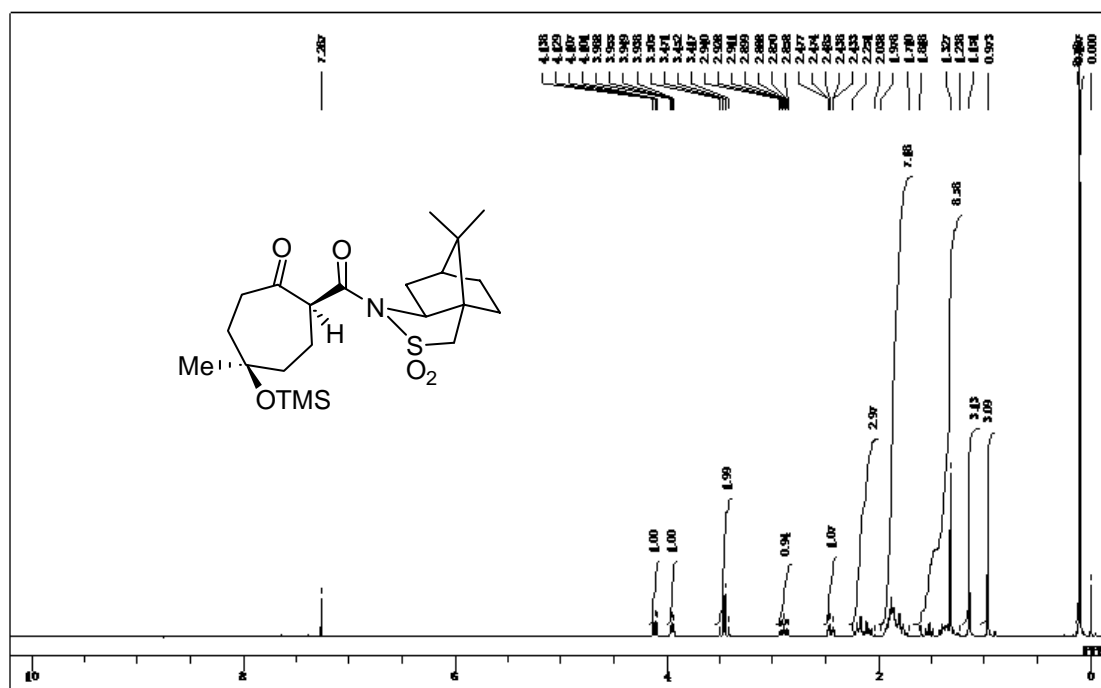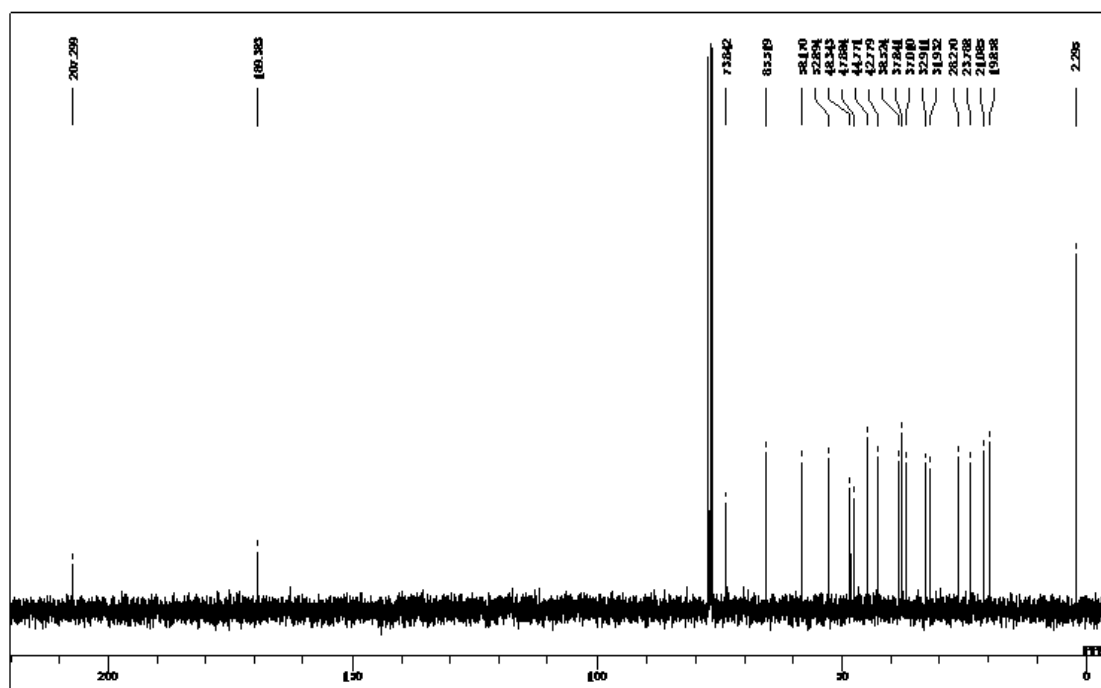



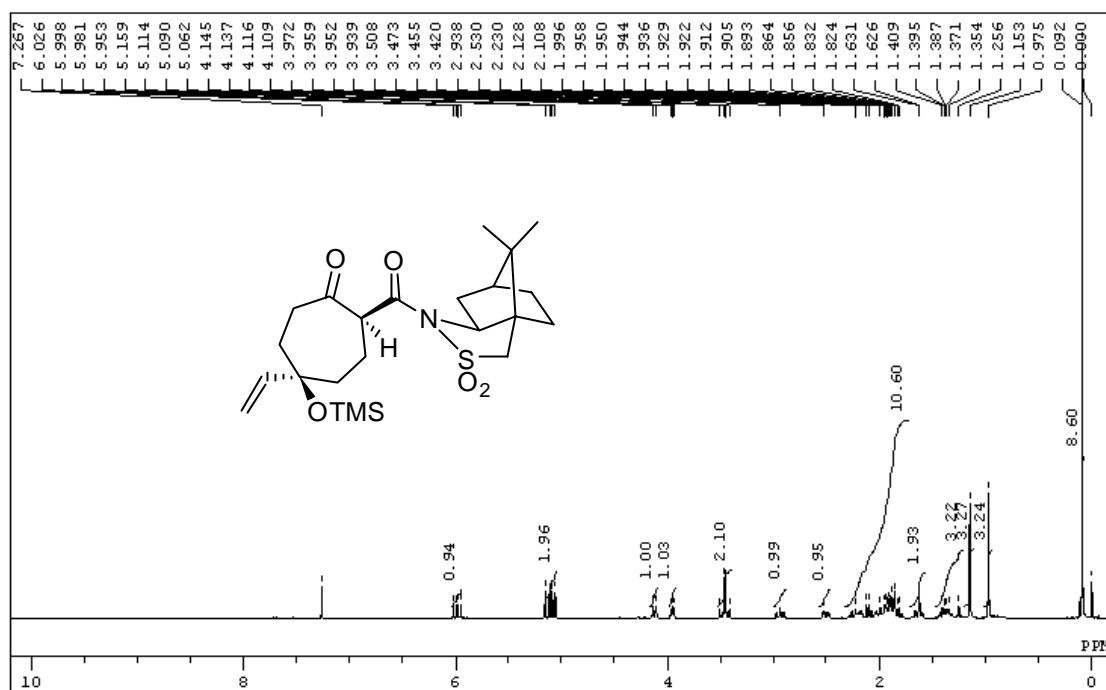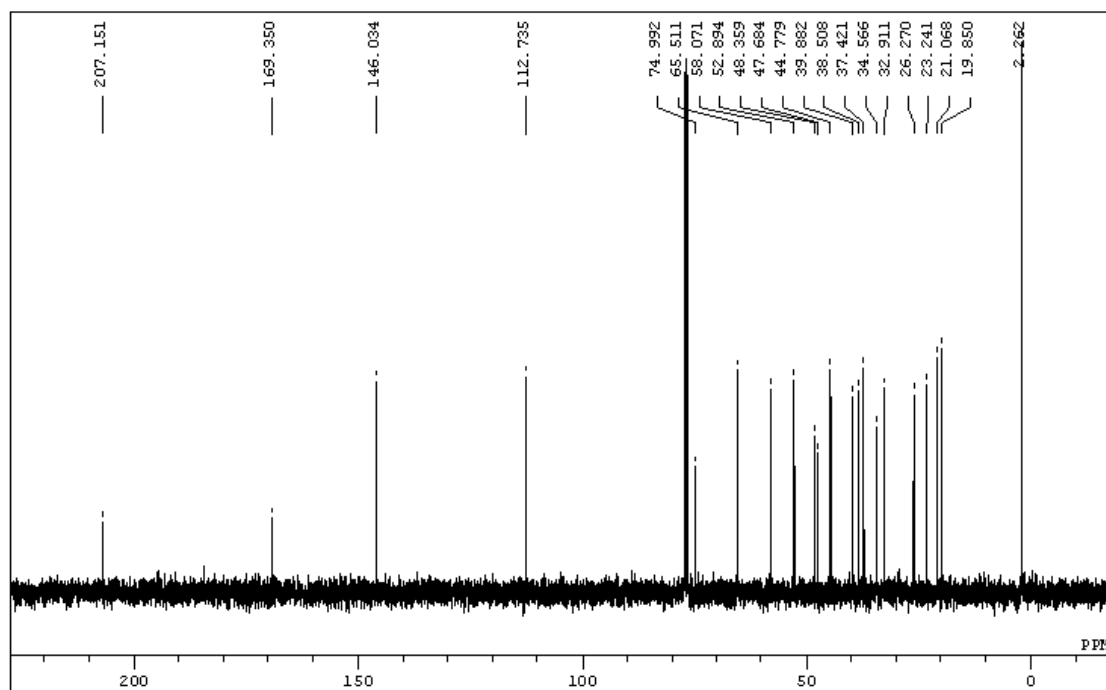

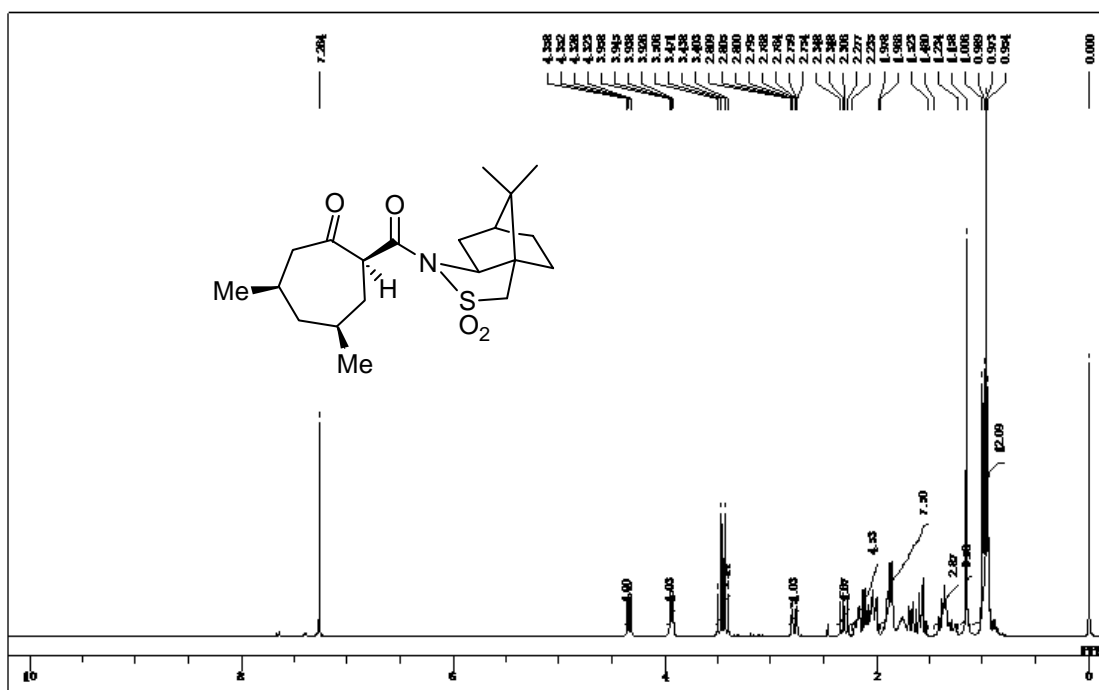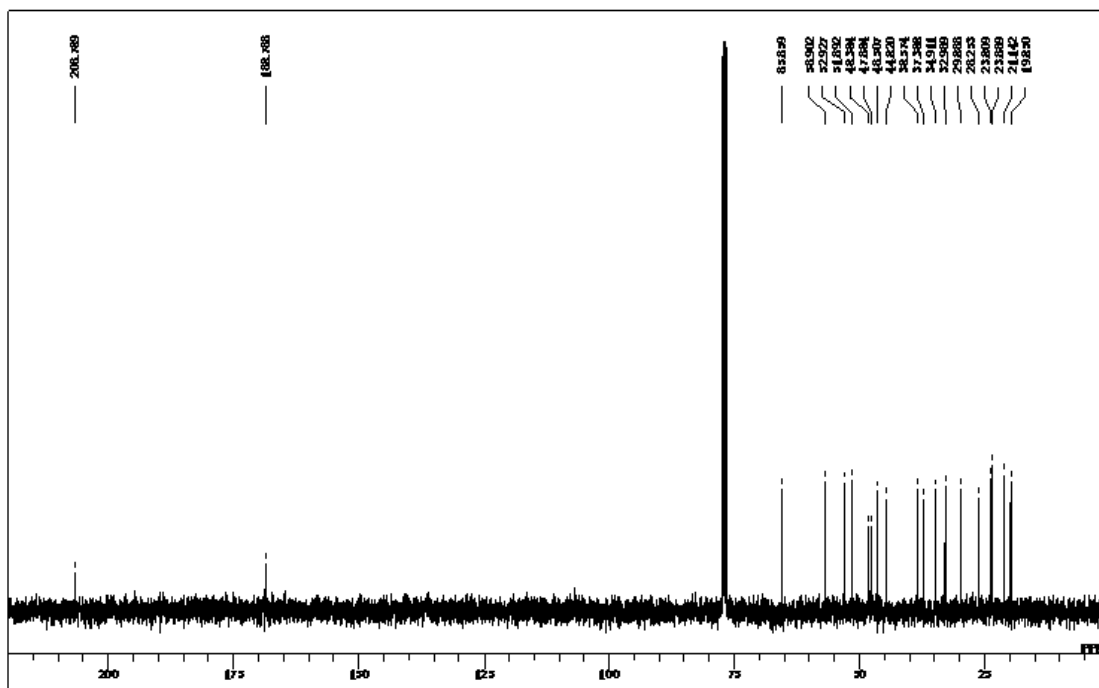

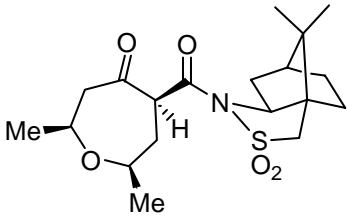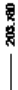

— 187.572

## After

# #17!

**APPENDIX**

58219

1817  
1825

14.88M

37.940

**TIME** \_\_\_\_\_

22541

2120717 19842

---

S50

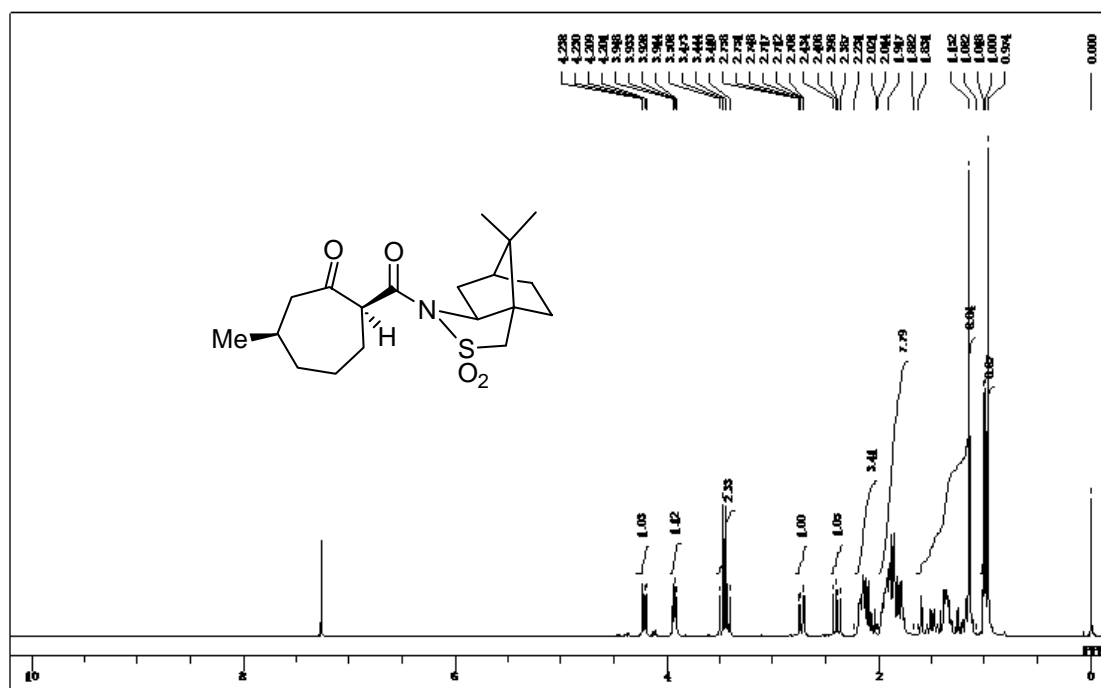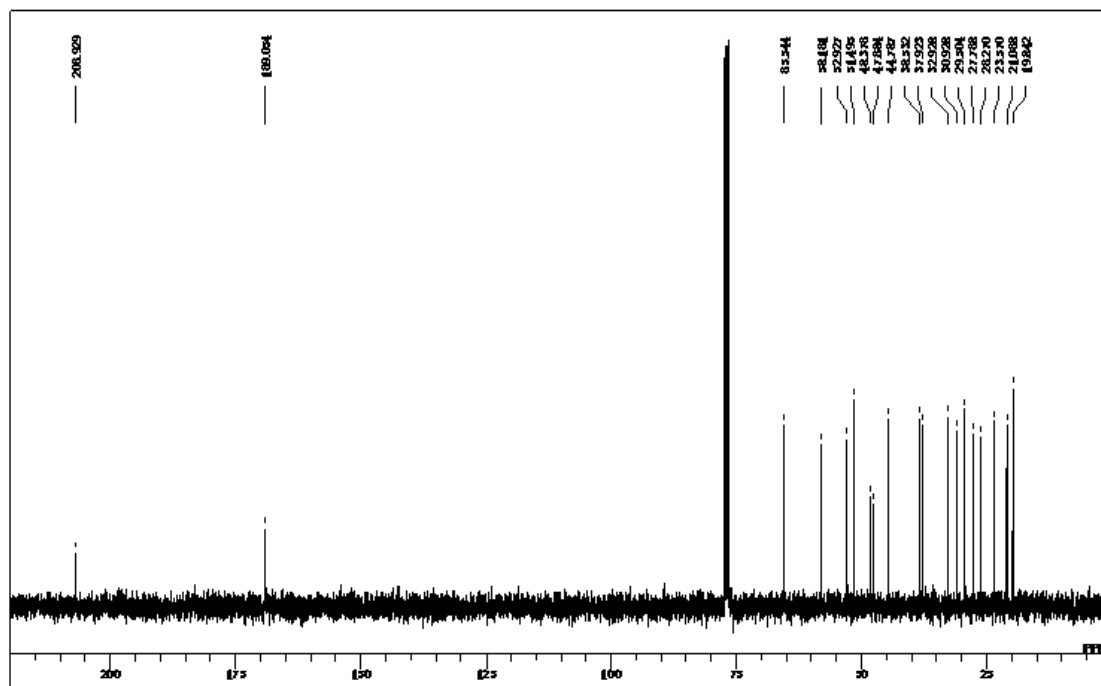

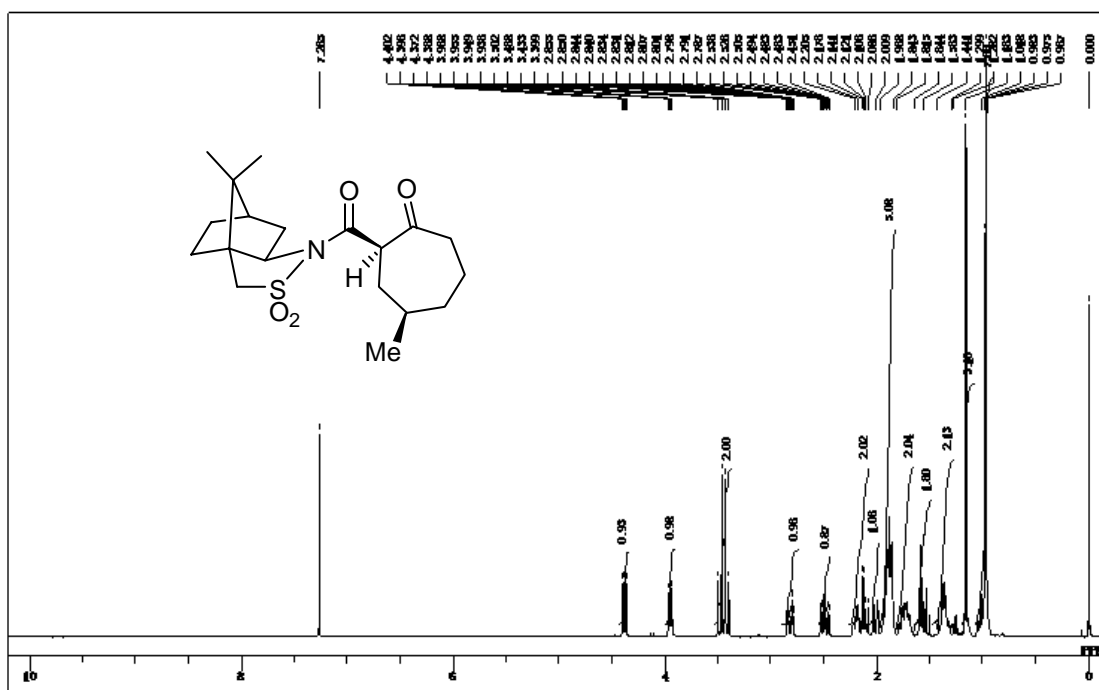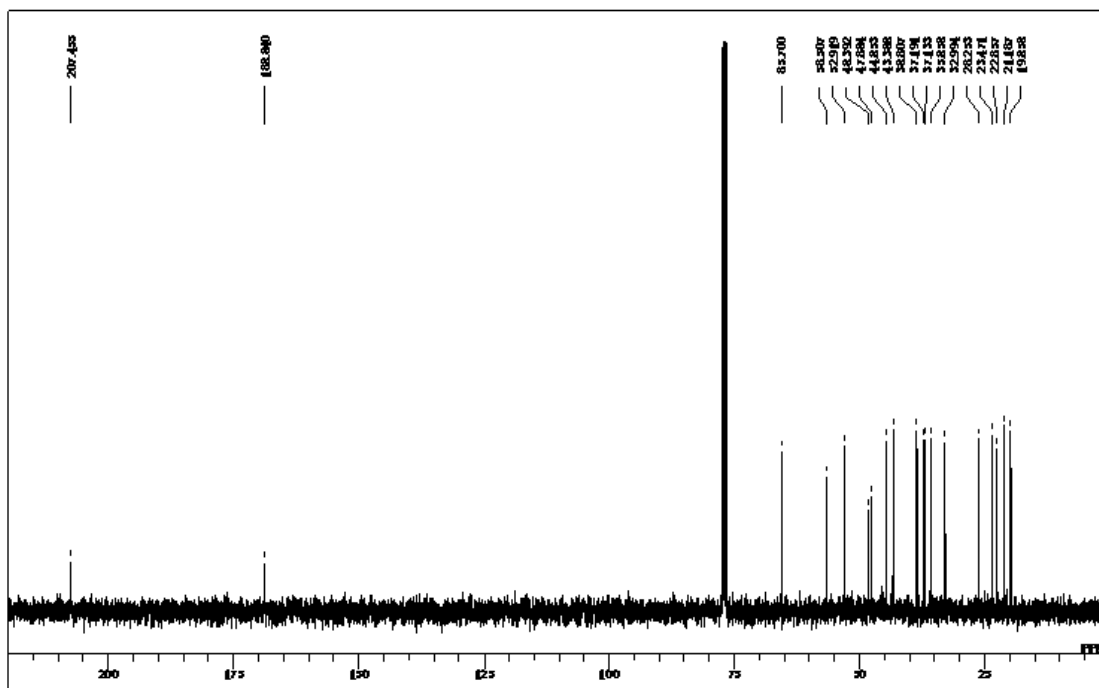

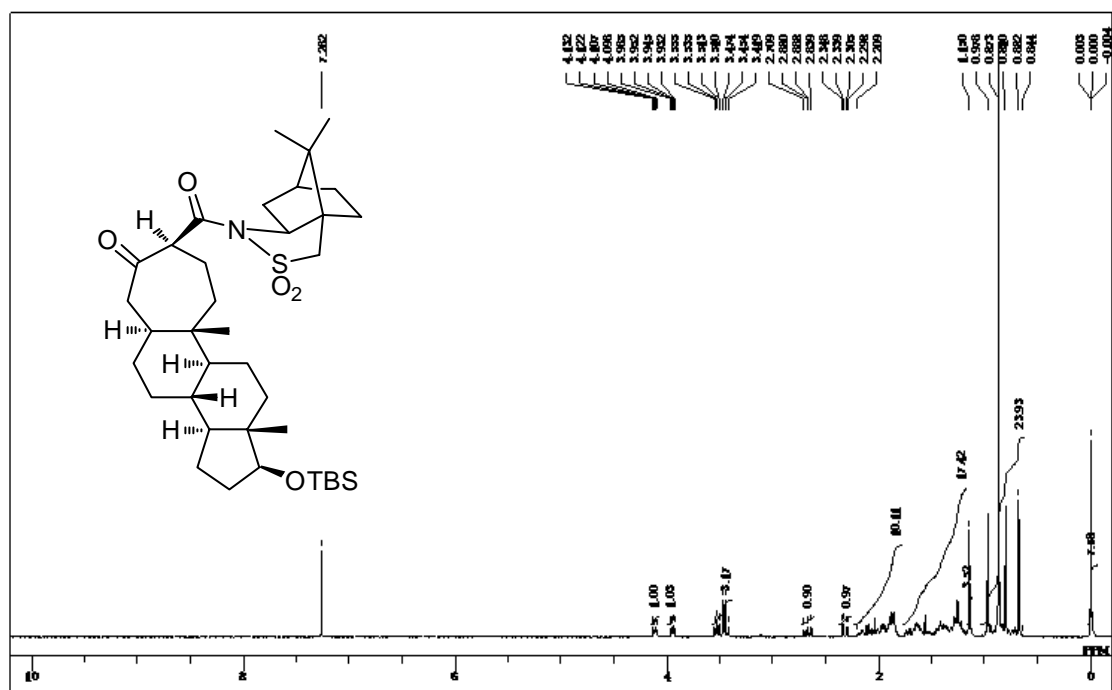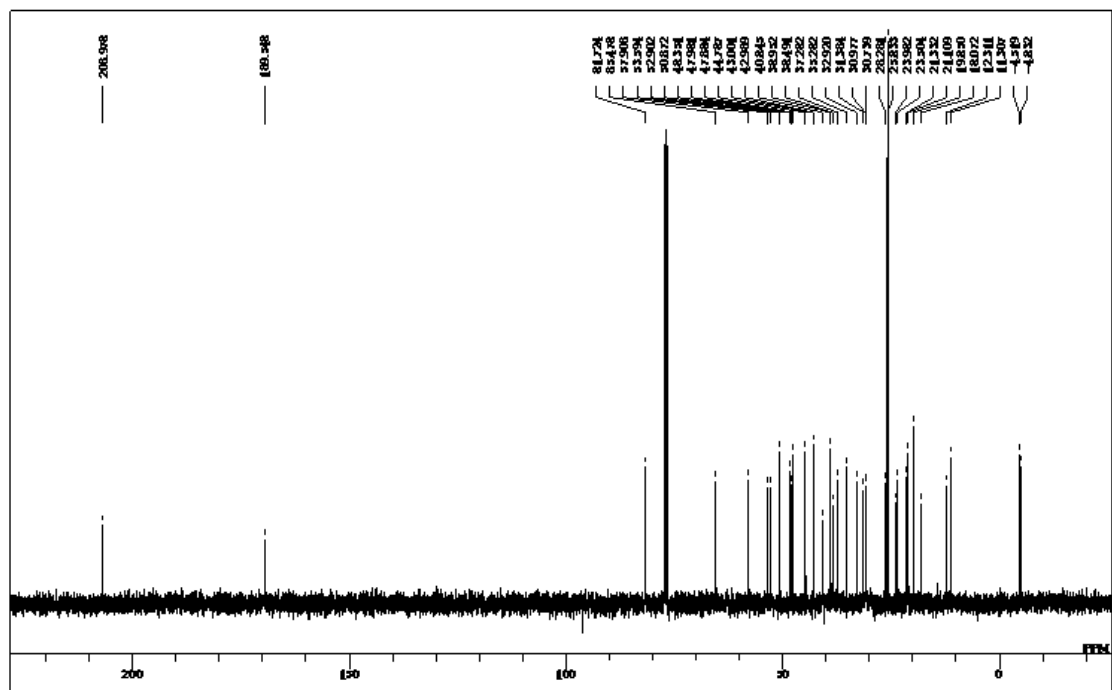

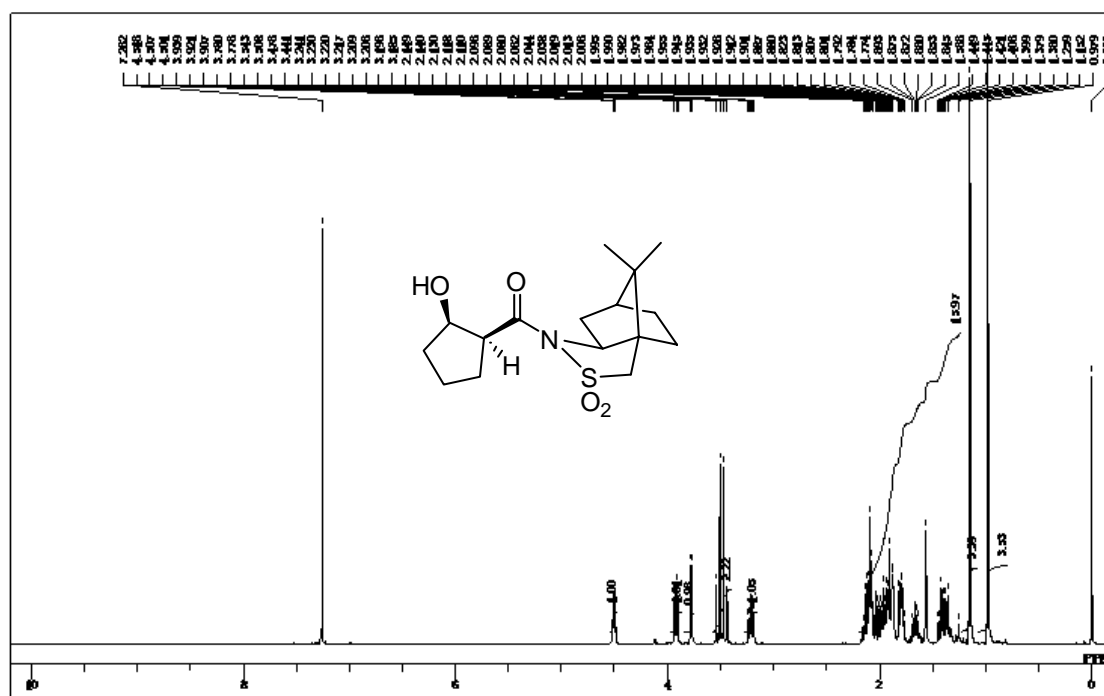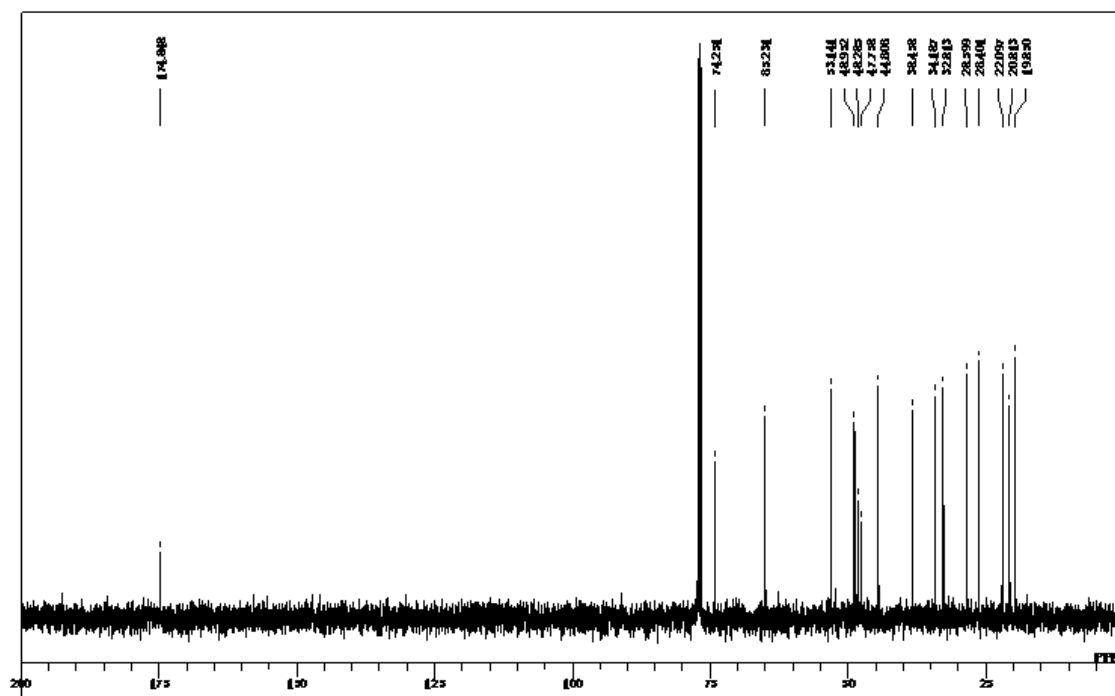

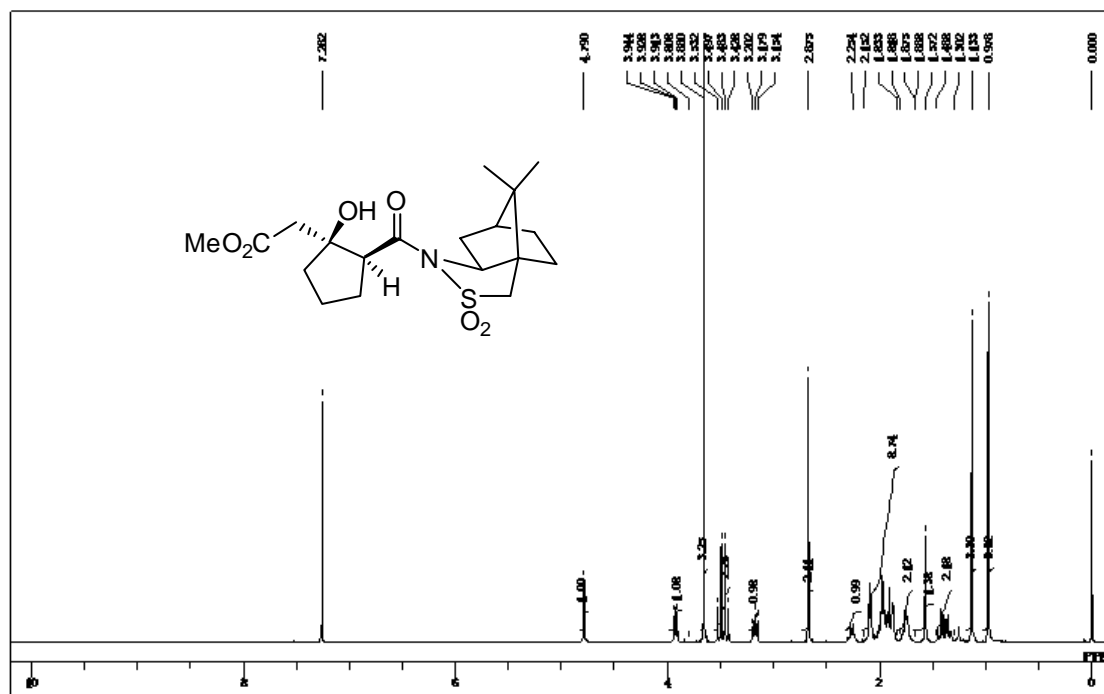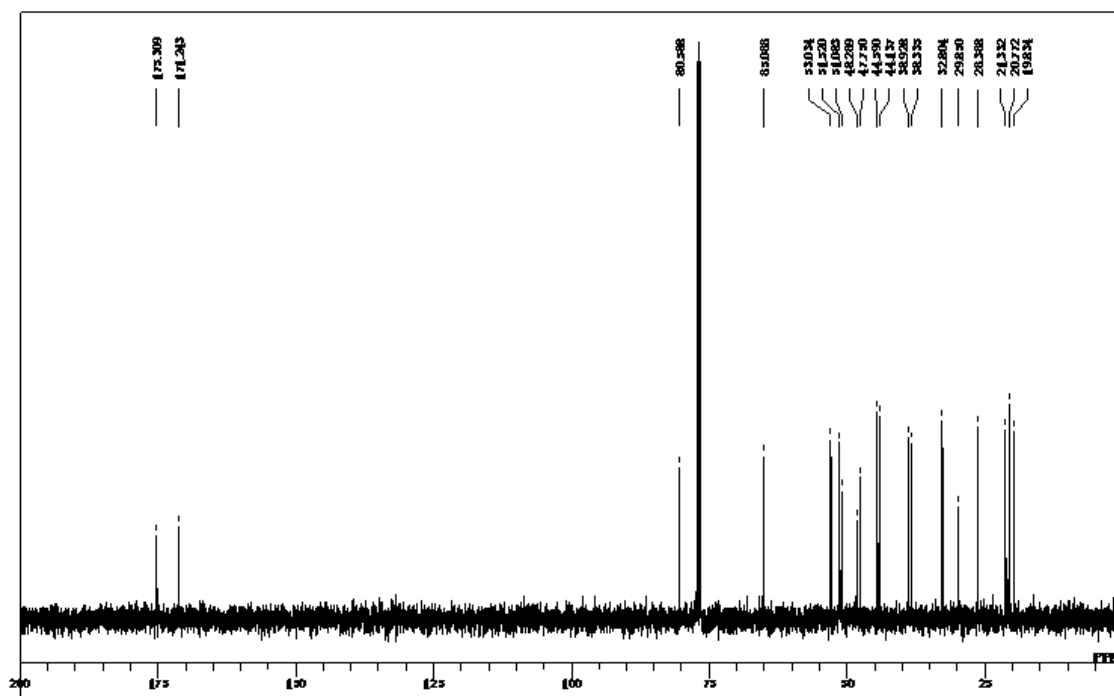

Supplement: c0cc01424a.pdf [file c0cc01424a.pdf]
